# Supplementary material for: Post‐translational modifications linked to preclinical Alzheimer's disease–related pathological and cognitive changes
Source: PubMed Central journal article supplement (PMC10984434; doi:10.1002/alz.13576), 2023-12-25
Supplement: ALZ-20-1851-s004.pdf [file ALZ-20-1851-s004.pdf]

Module M2 (Axonogenesis) Expression by Diagnosis

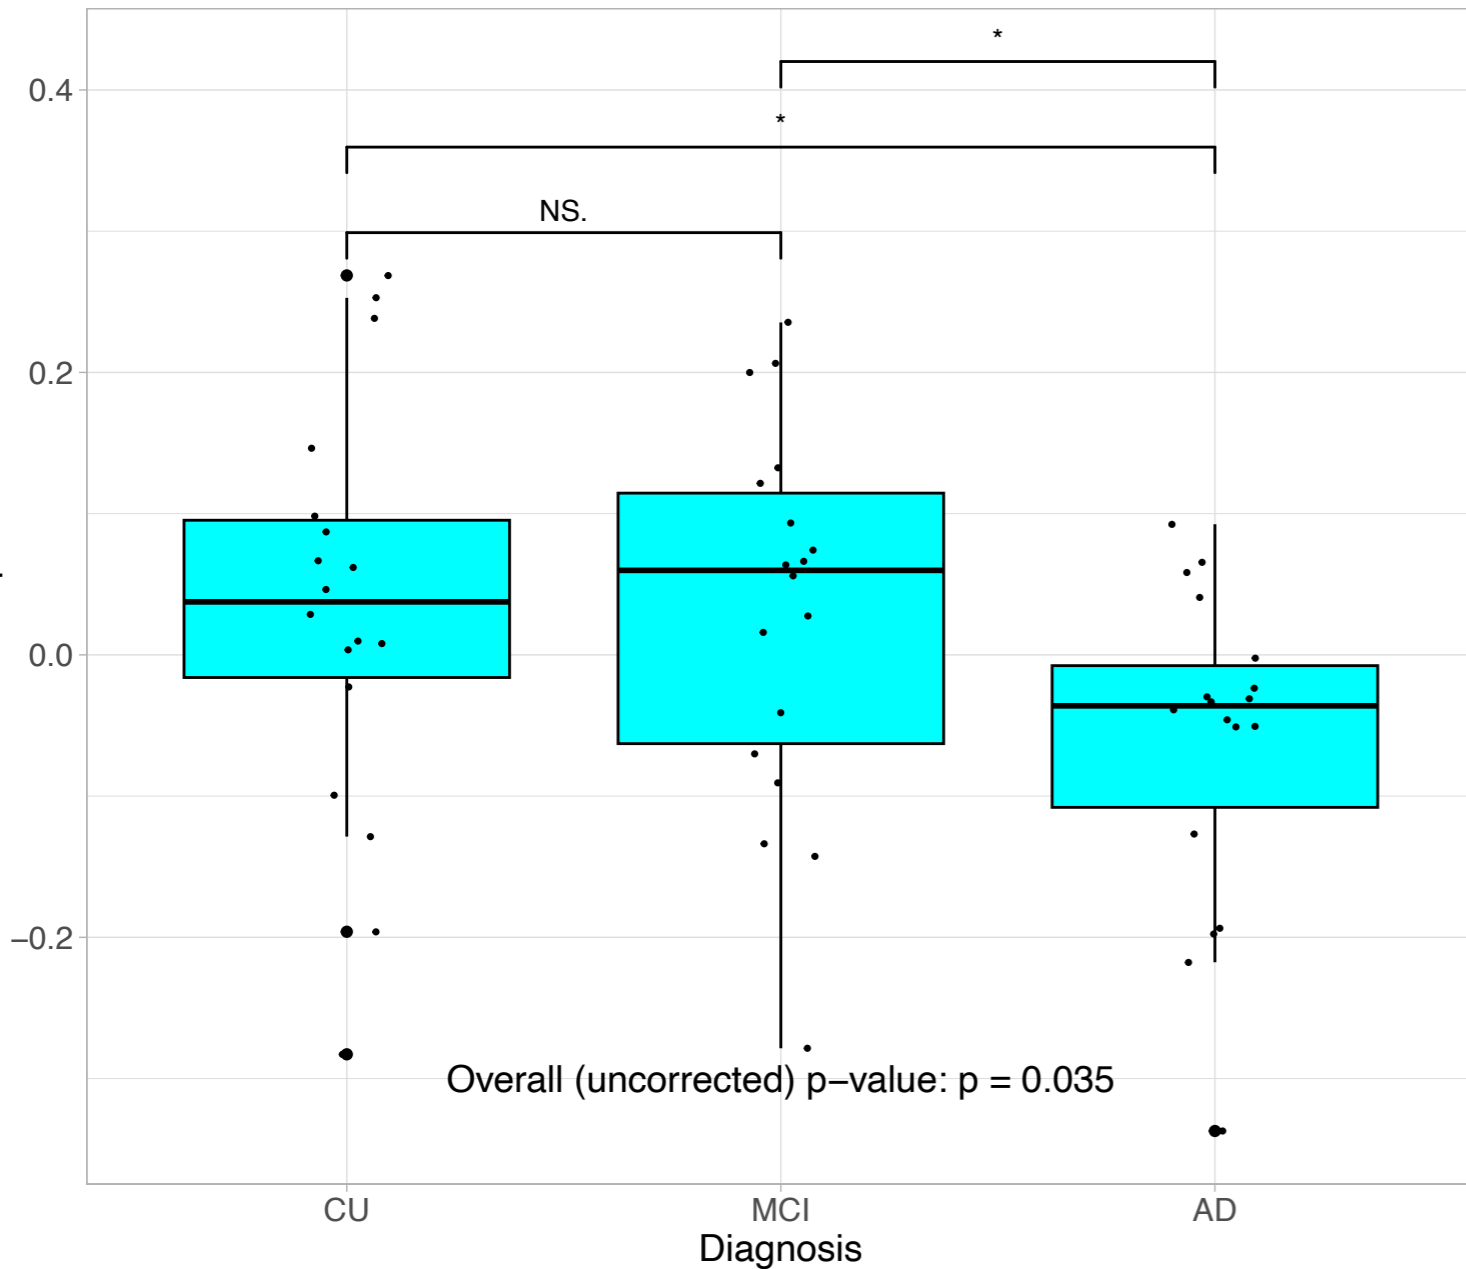

Module M18 (Steroid dehydrogenase activity) Expression by Diagnosis

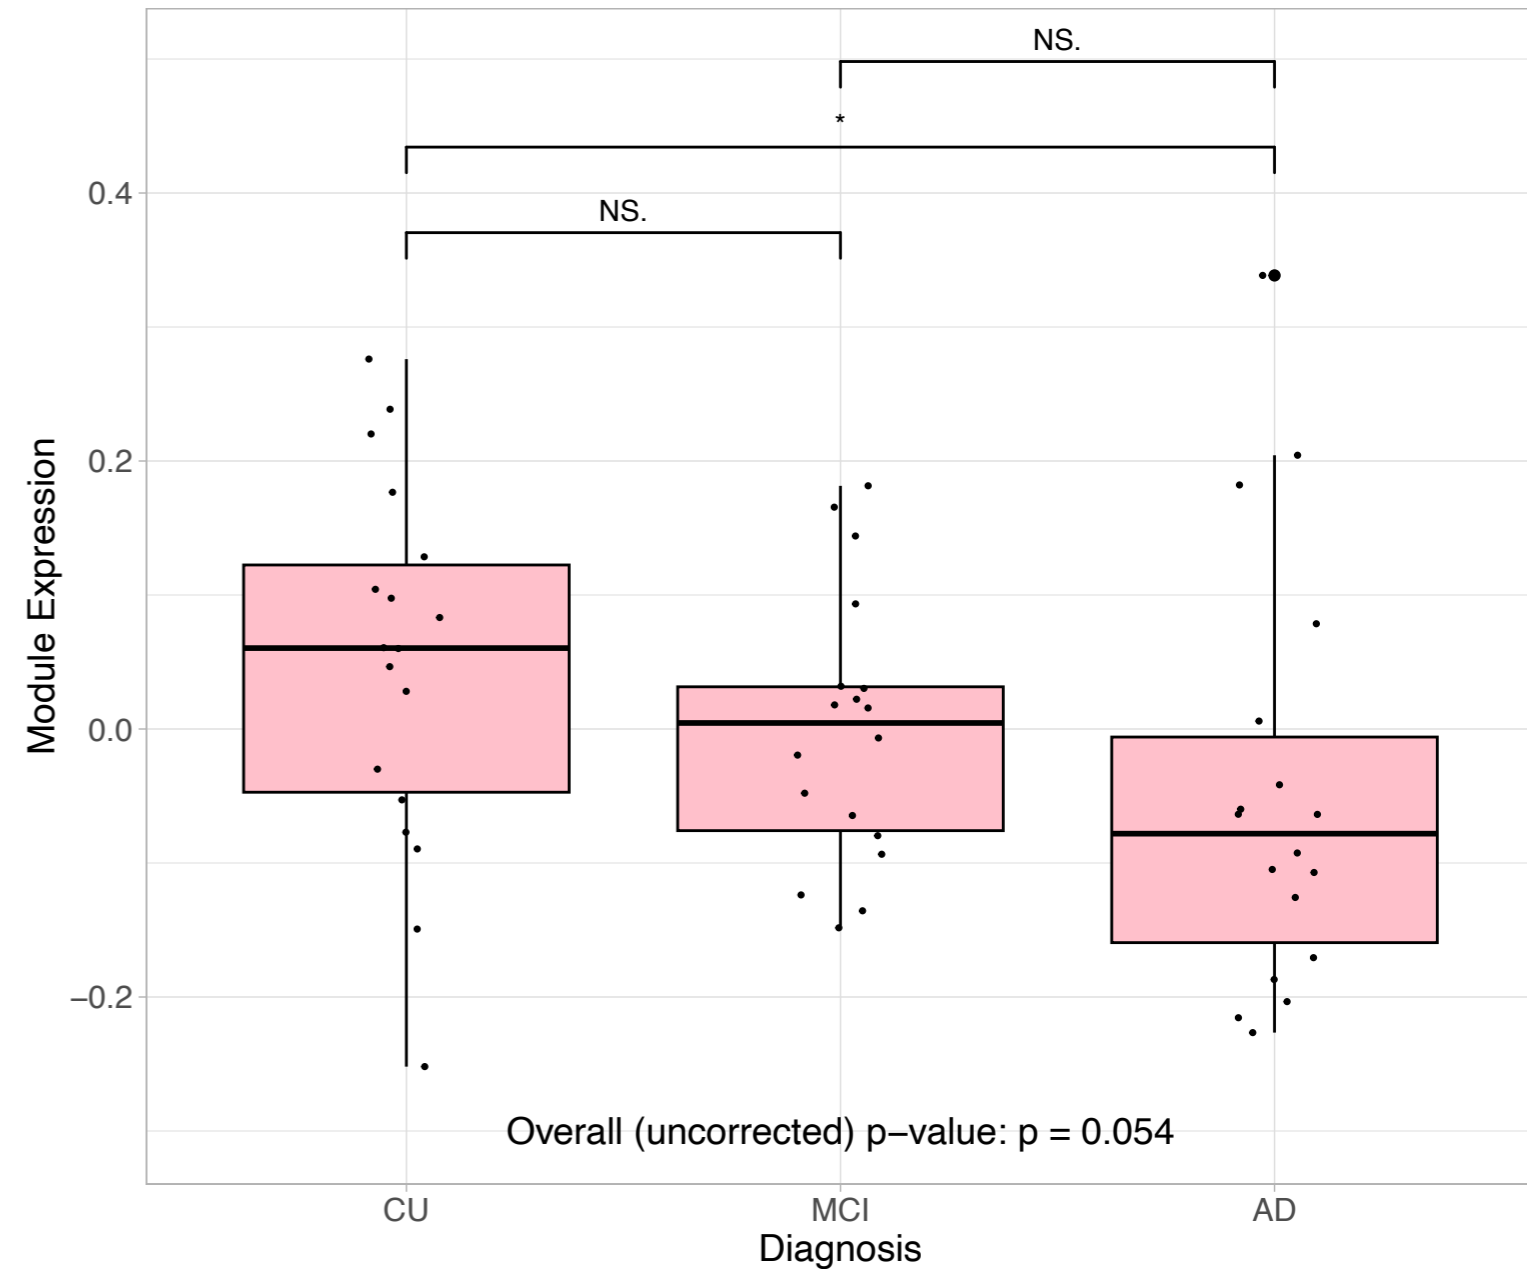

**Supplemental Figure 3. Modules by clinical disease stage for relationships significant before multiple comparison correction.** A box plot illustrating the results of Kruskal-Wallis tests for one-way ANOVA used to calculate module eigenprotein relationships to clinical disease stage. Modules whose significance did not survive FDR correction for multiple comparisons — on the left, module M2 (axonogenesis) and on the right, module M18 (steroid dehydrogenase activity) — are depicted here.
