# Supplementary material for: Post‐translational modifications linked to preclinical Alzheimer's disease–related pathological and cognitive changes
Source: PubMed Central journal article supplement (PMC10984434; doi:10.1002/alz.13576), 2023-12-25
Supplement: ALZ-20-1851-s008.pdf [file ALZ-20-1851-s008.pdf]

A

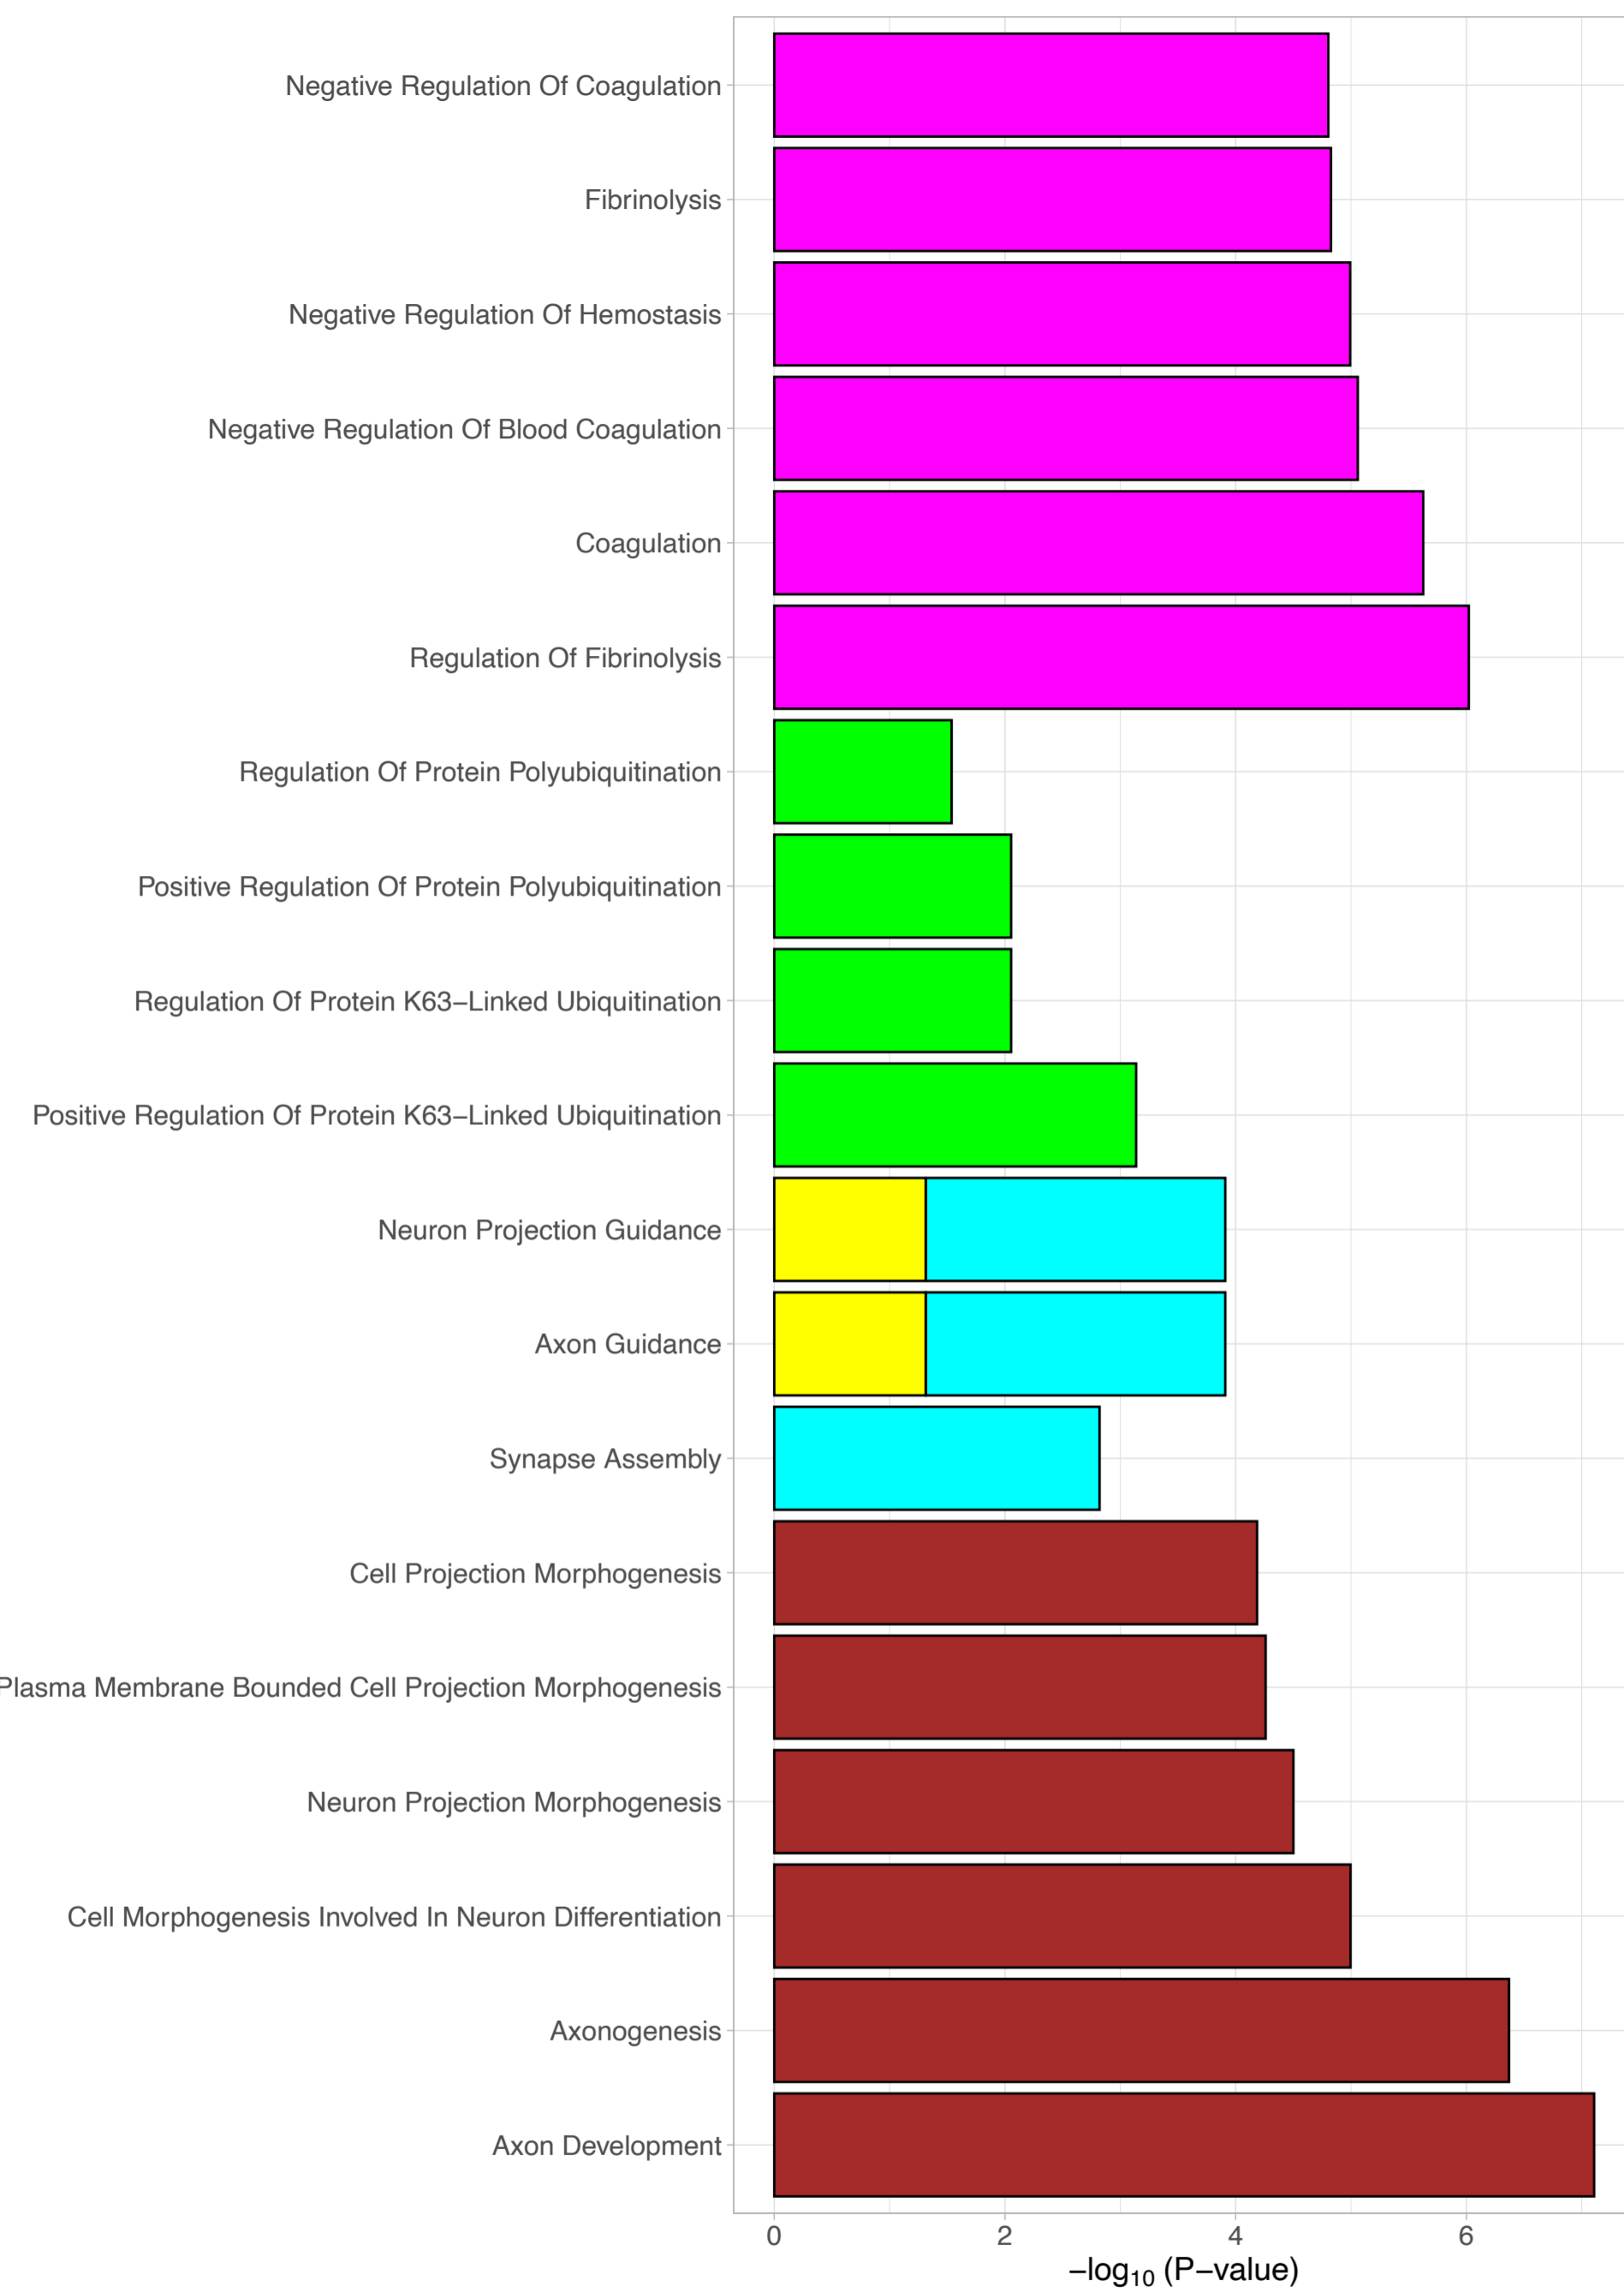

B

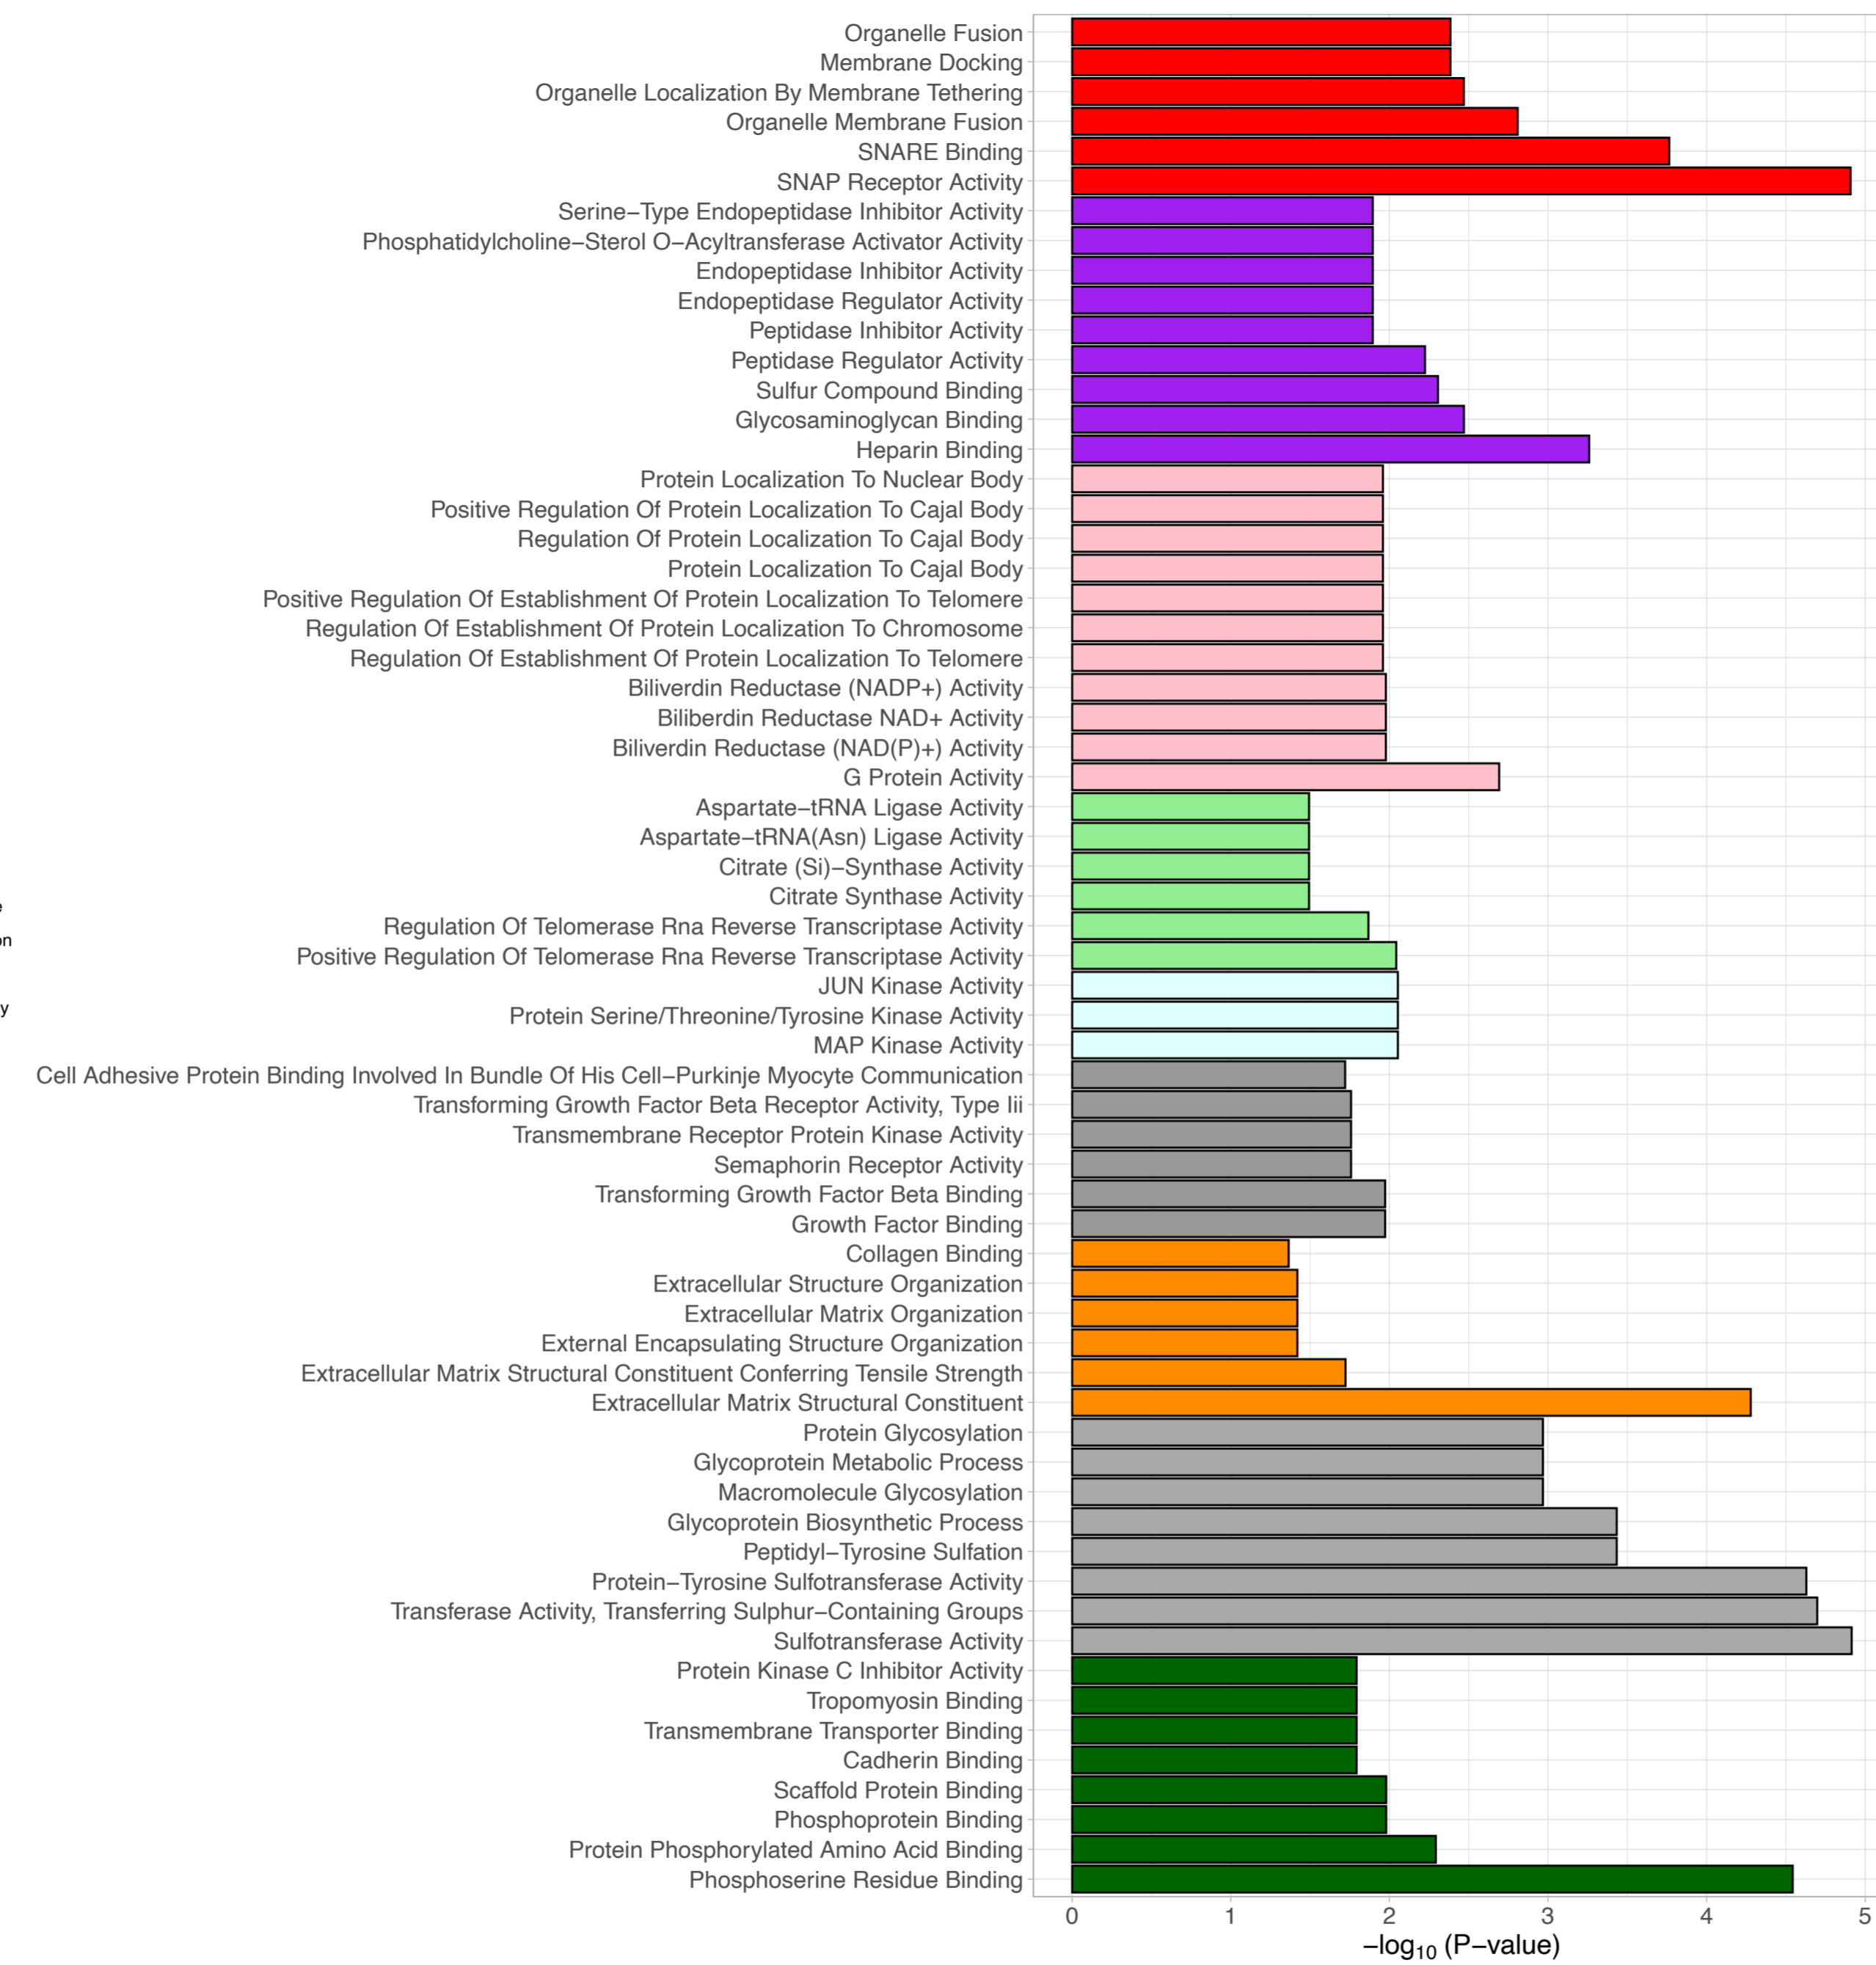

C

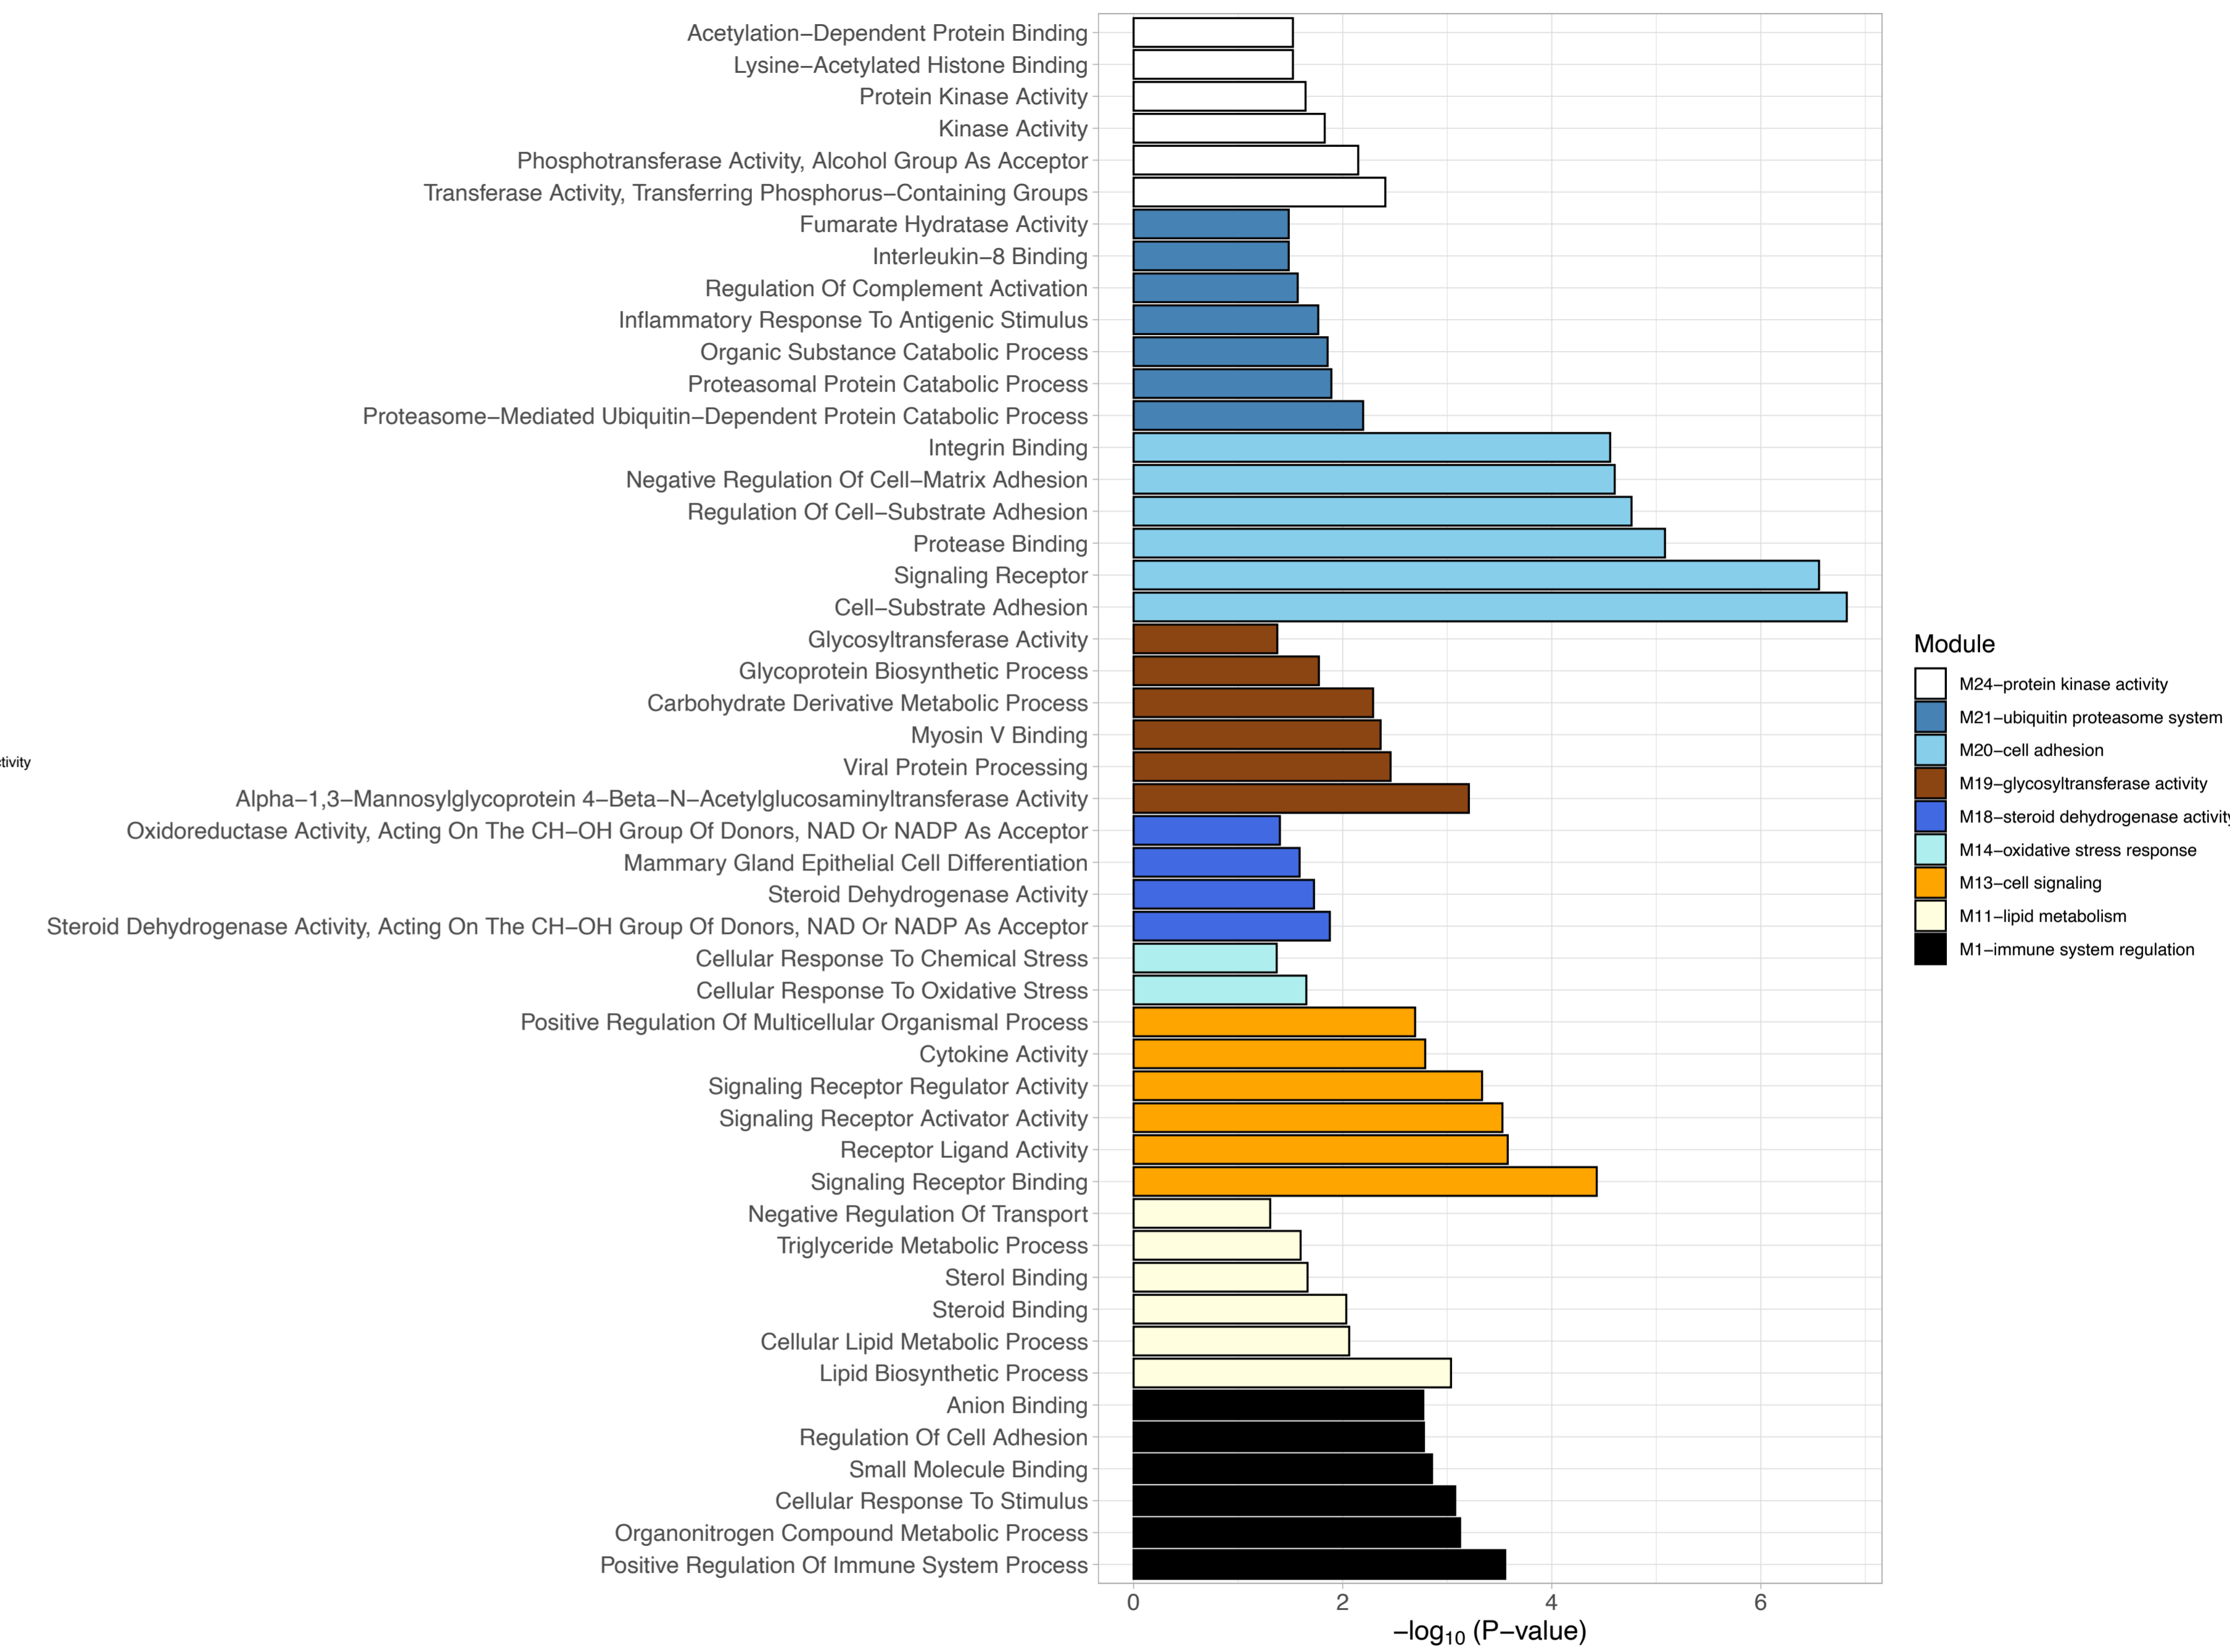

**Supplemental Figure 2. Gene ontology analysis for all modules.** Functional annotations derived from gene ontology analyses of all 25 co-expression network modules, conducted using g:Profiler. Only 22 contained functional enrichments that exceeded significance thresholds, and they are depicted here. The top six most significant gene ontology (GO) biological process and/or molecular function terms per module are displayed (y-axis), against their respective  $-\log_{10}$  p-values (x-axis). A) Gene ontology results against a custom background of all SomaLogic-quantified proteins, adjusted using the default multiple comparison algorithm (g:SCS). B) Gene ontology results against a custom background of all SomaLogic-quantified proteins, adjusted using FDR correction. C) Gene ontology results against a background of all annotated genes, adjusted using the default multiple comparison algorithm (g:SCS).
