# Supplementary material for: Post‐translational modifications linked to preclinical Alzheimer's disease–related pathological and cognitive changes
Source: PubMed Central journal article supplement (PMC10984434; doi:10.1002/alz.13576), 2023-12-25

M2-axonogenesis Top20 general cell types

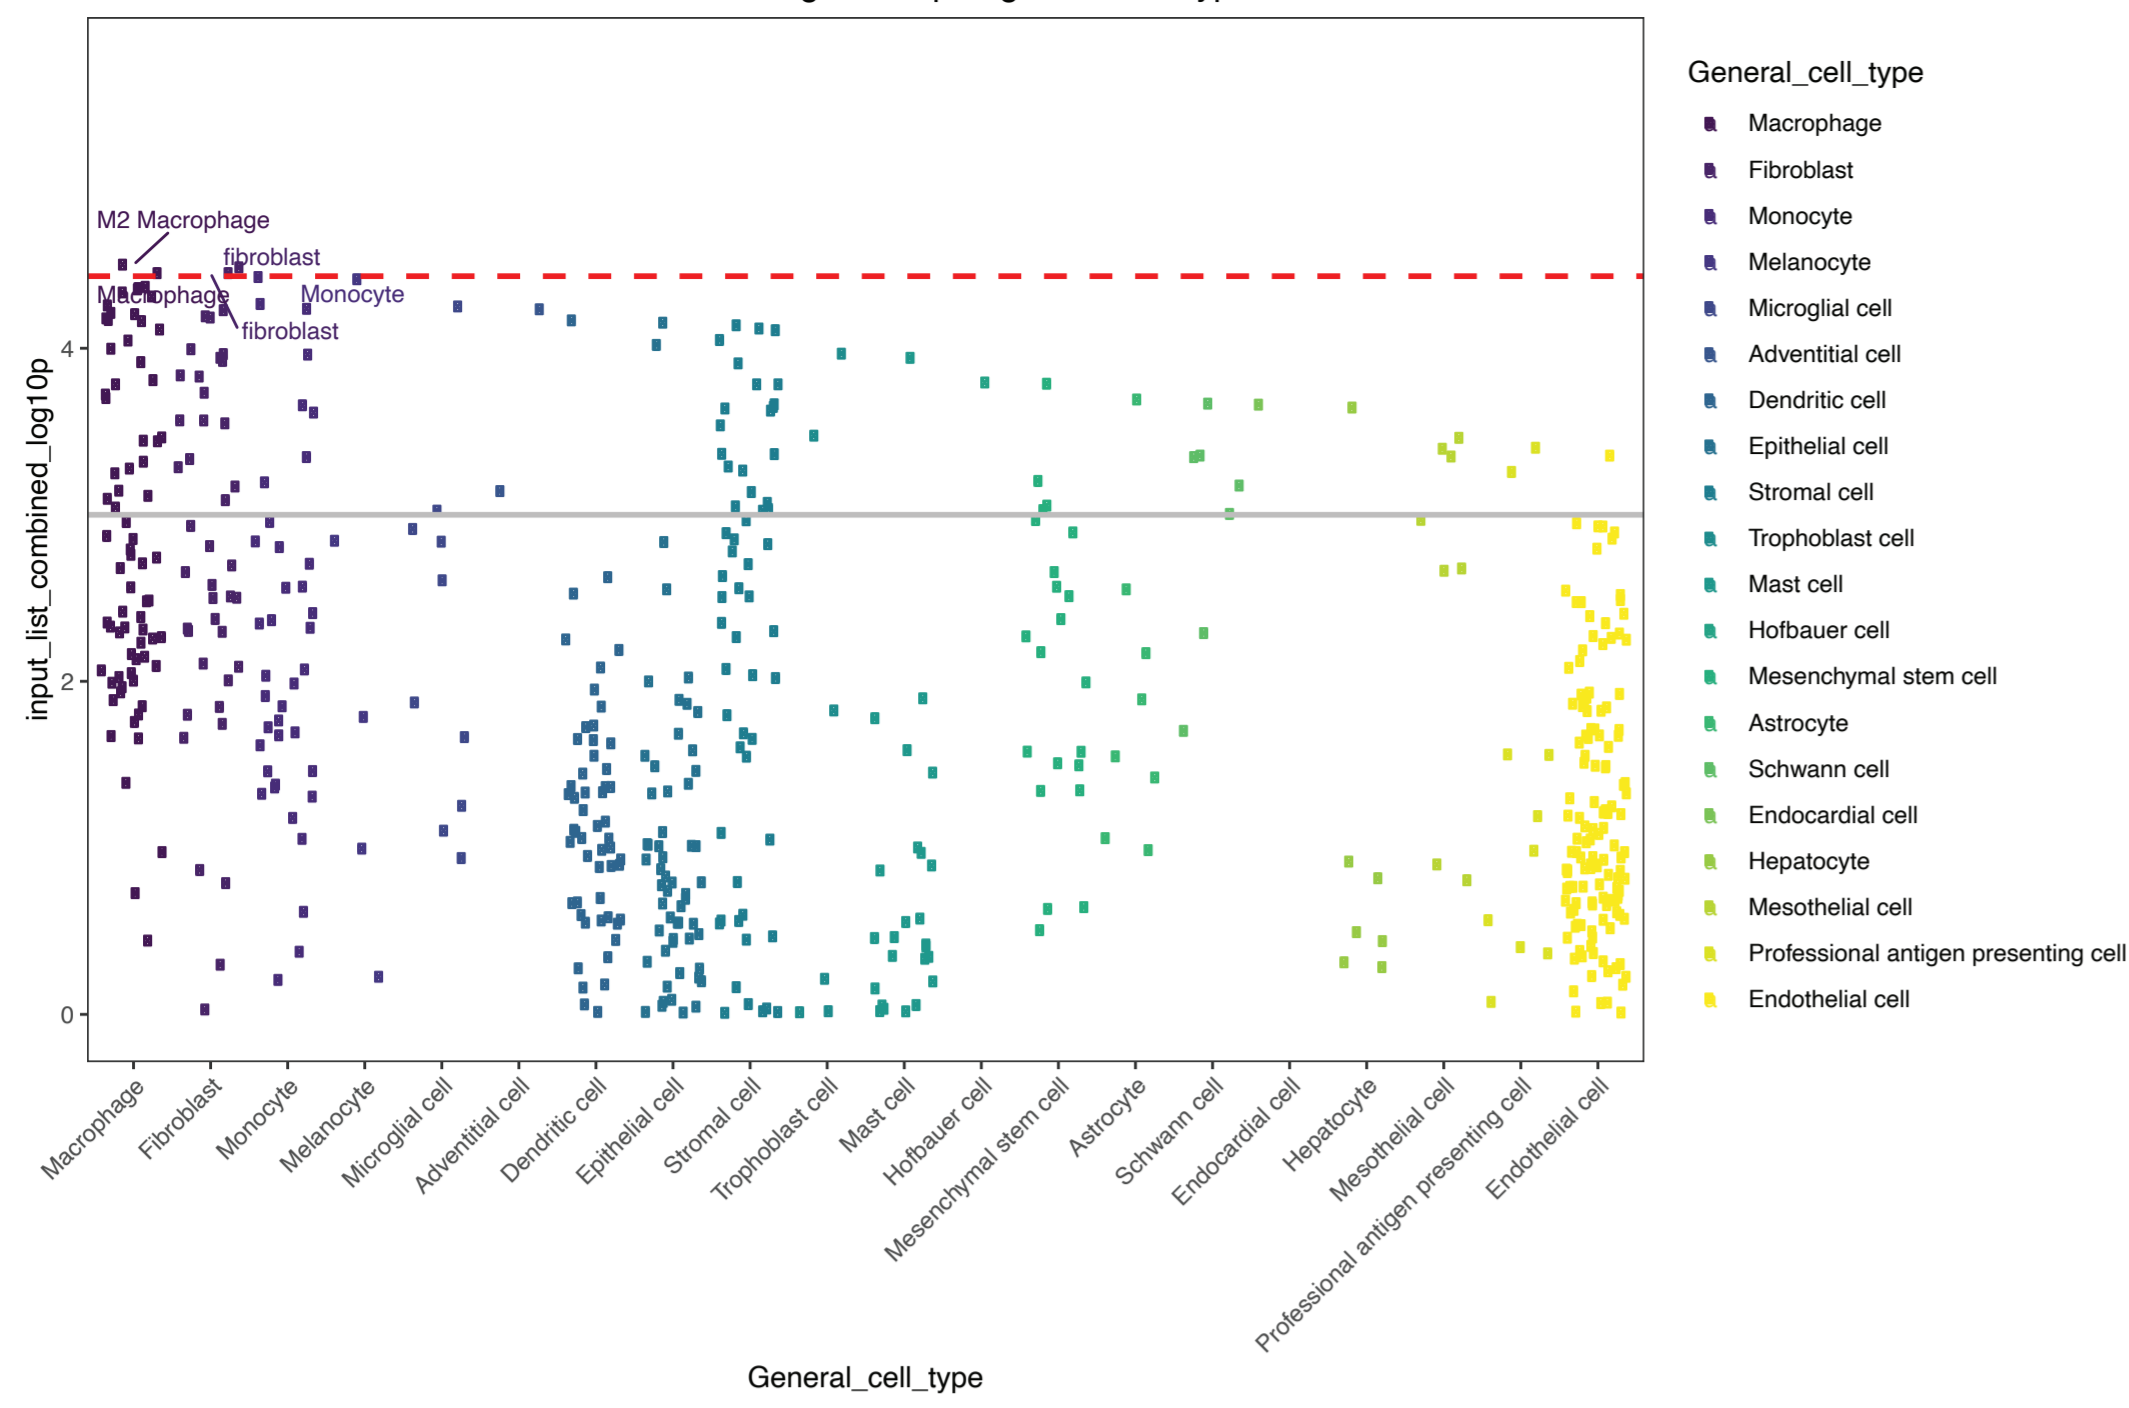

M10-telomerase RNA activity Top20 general cell types

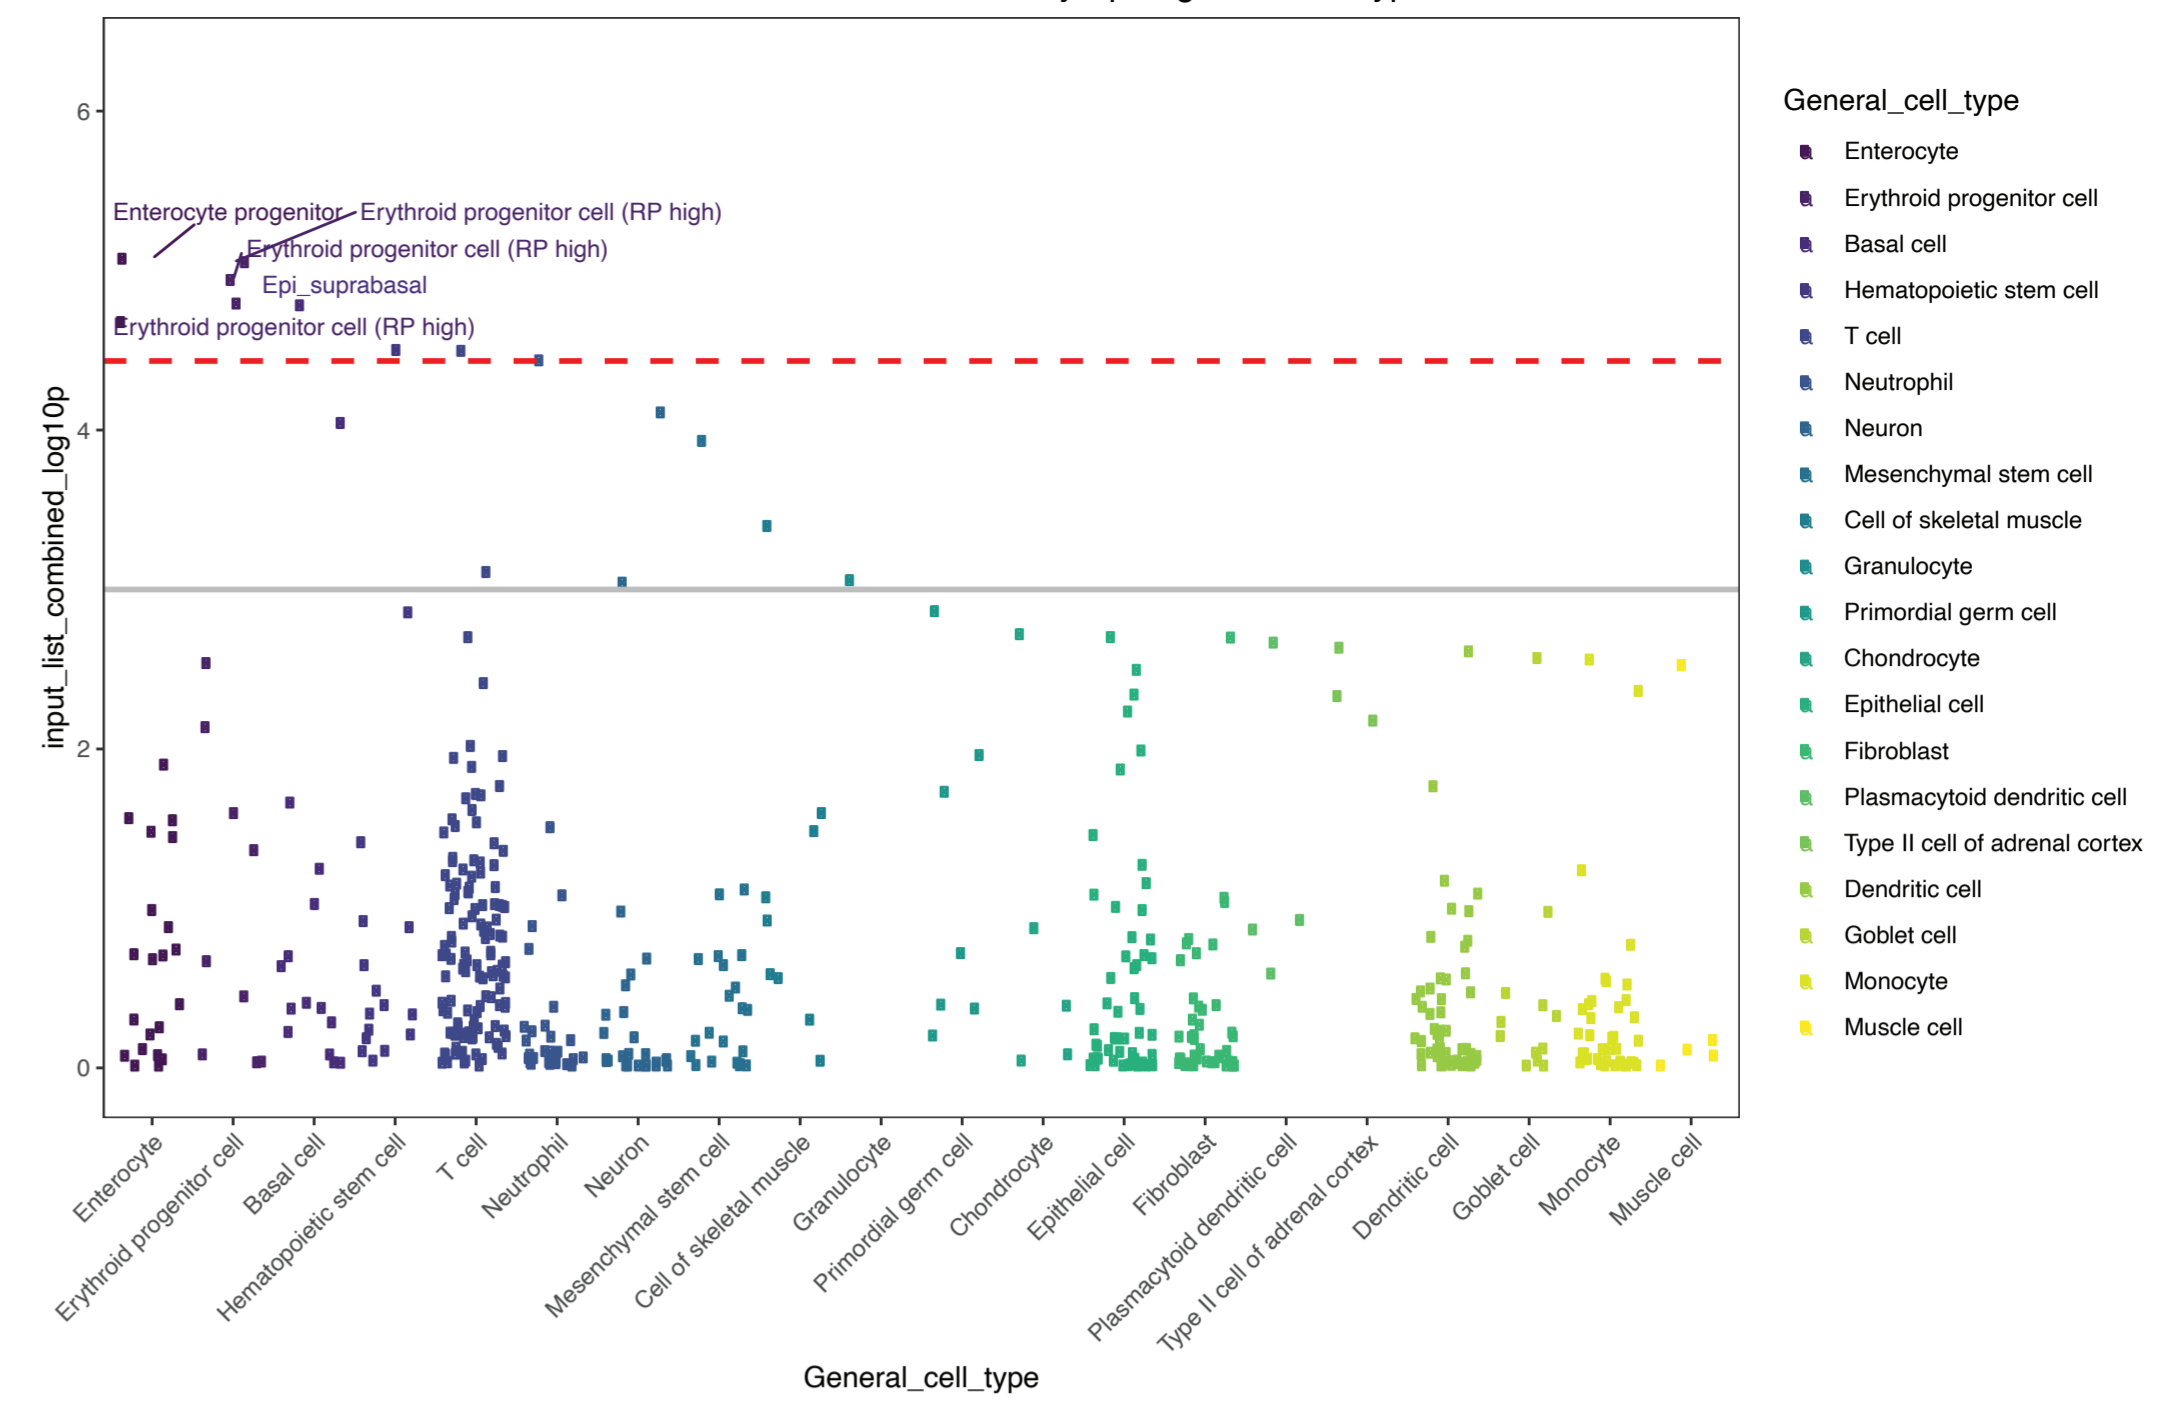

M3-synapse assembly Top20 general cell types

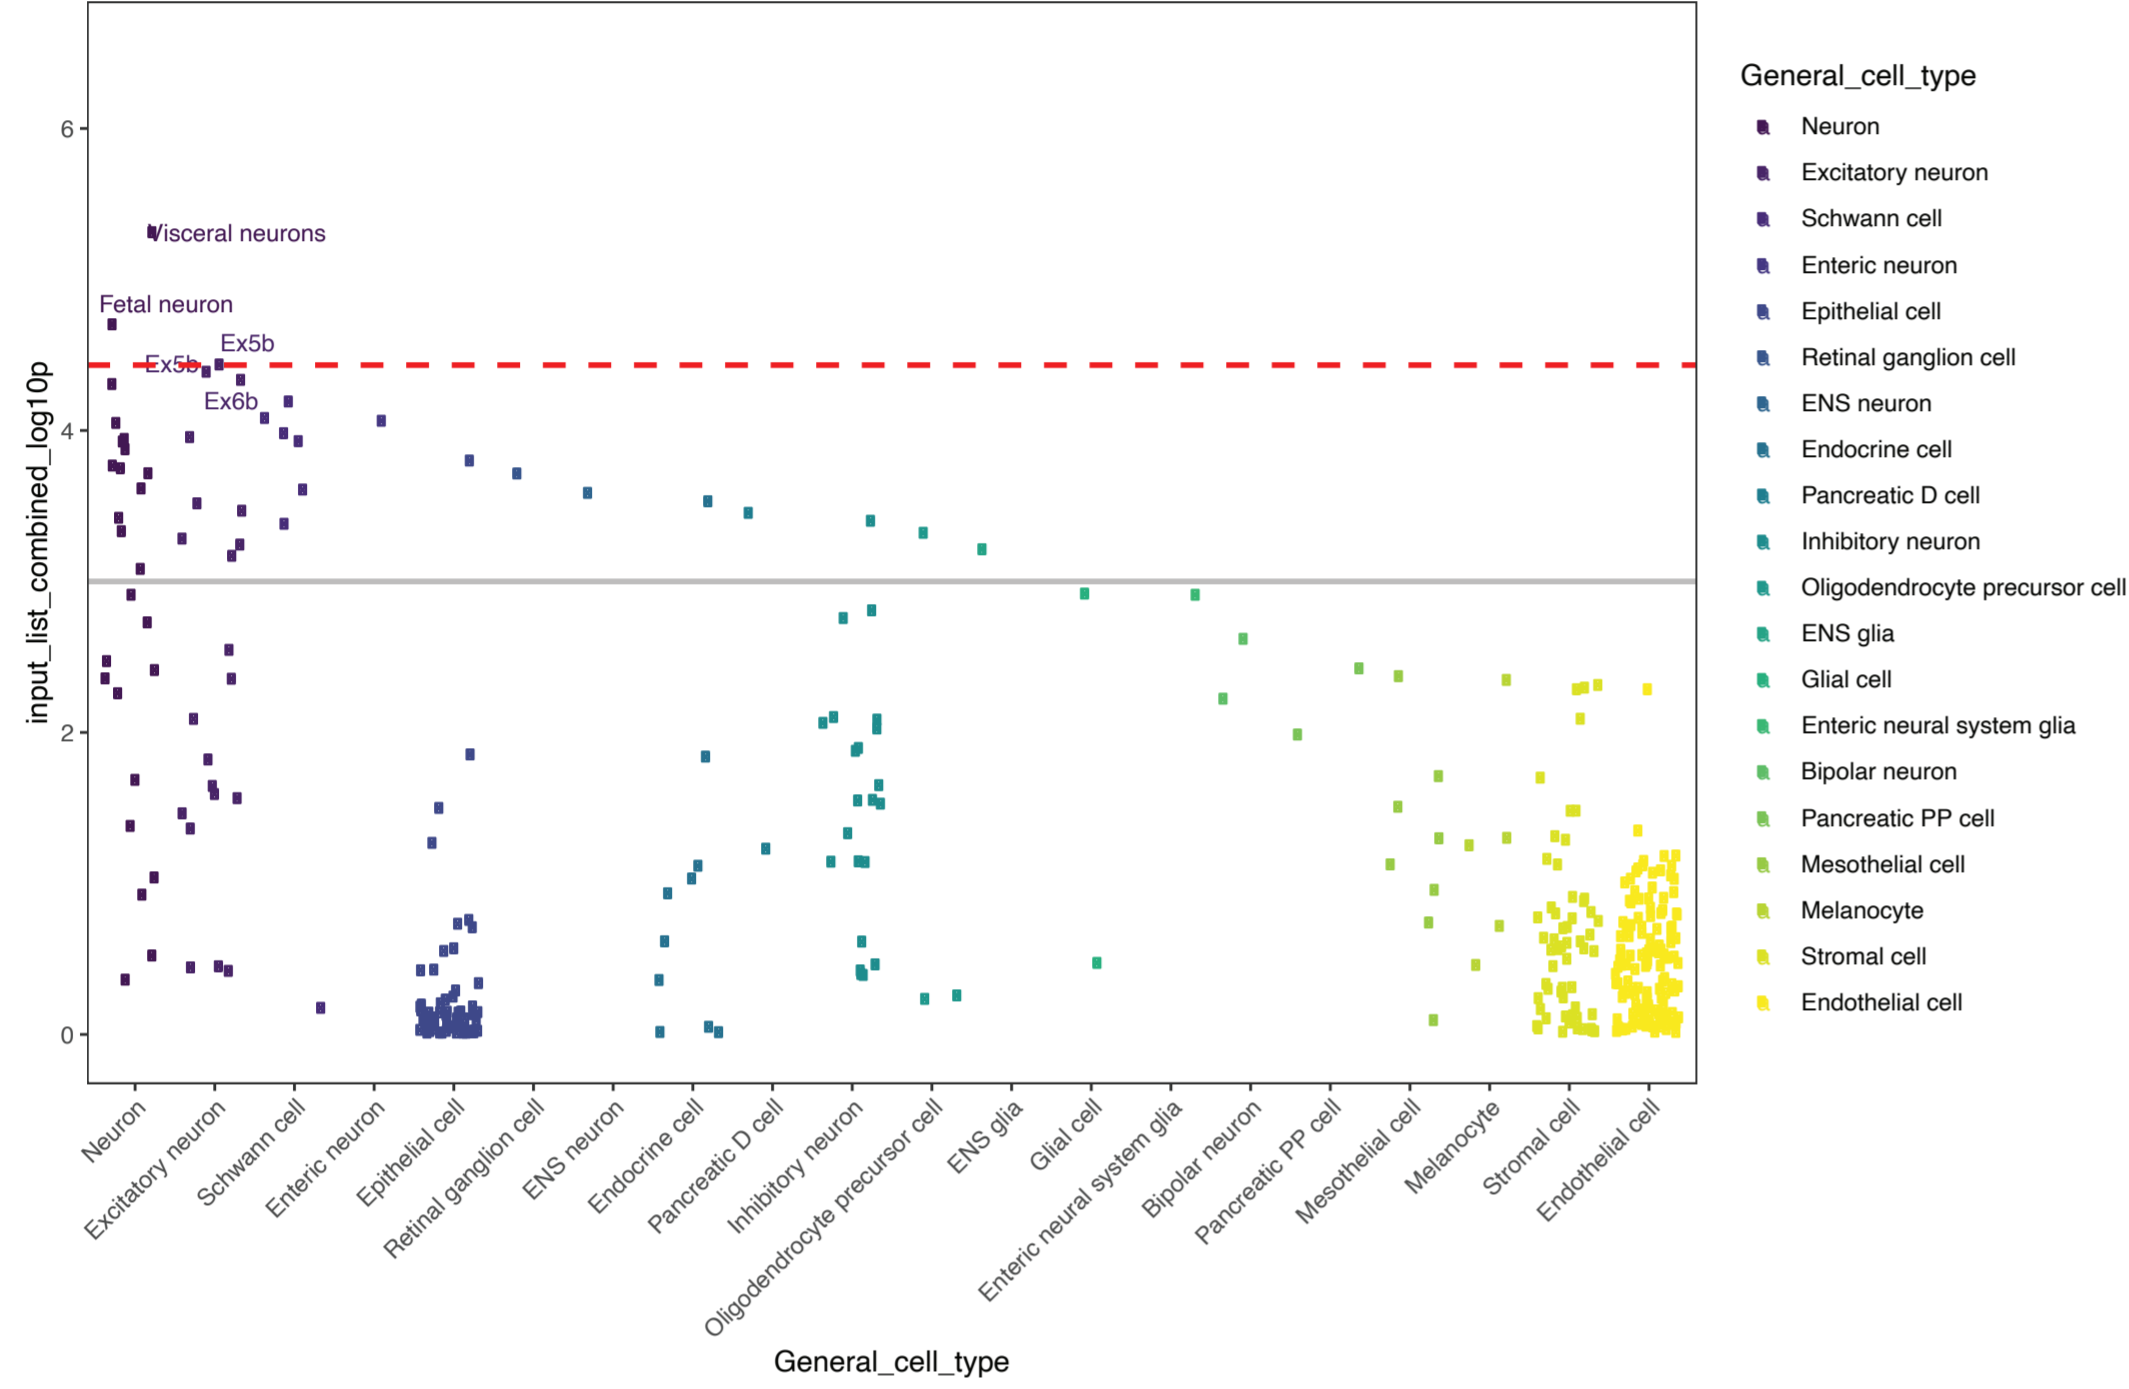

M15-G protein/oxidoreductase activity Top20 general cell types

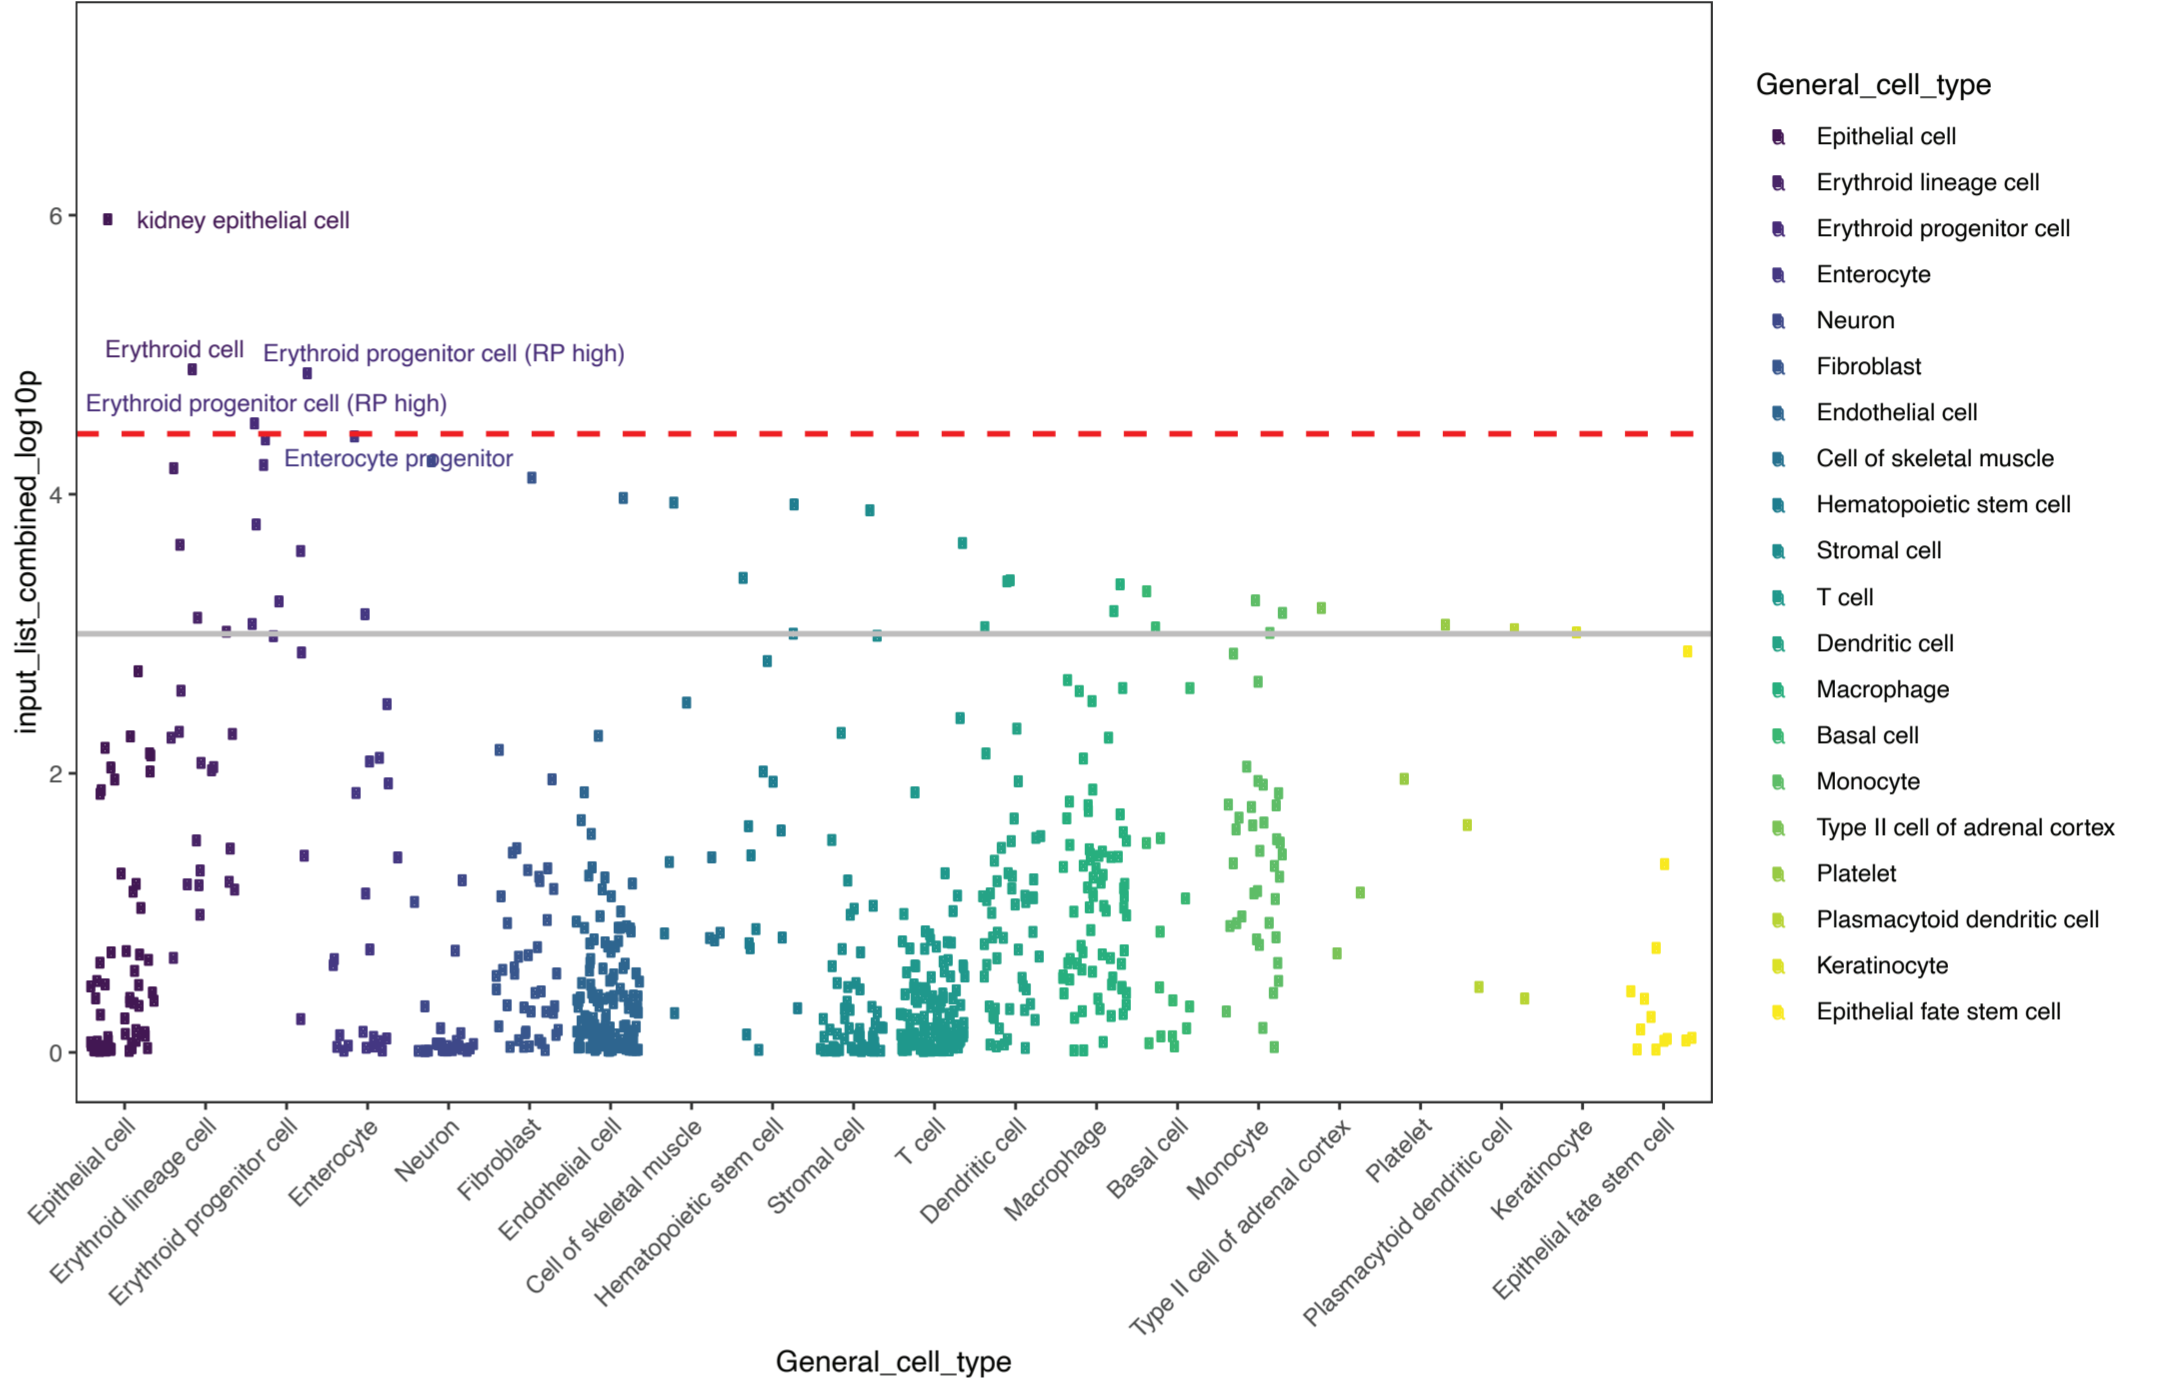

M4-phosphorylation Top20 general cell types

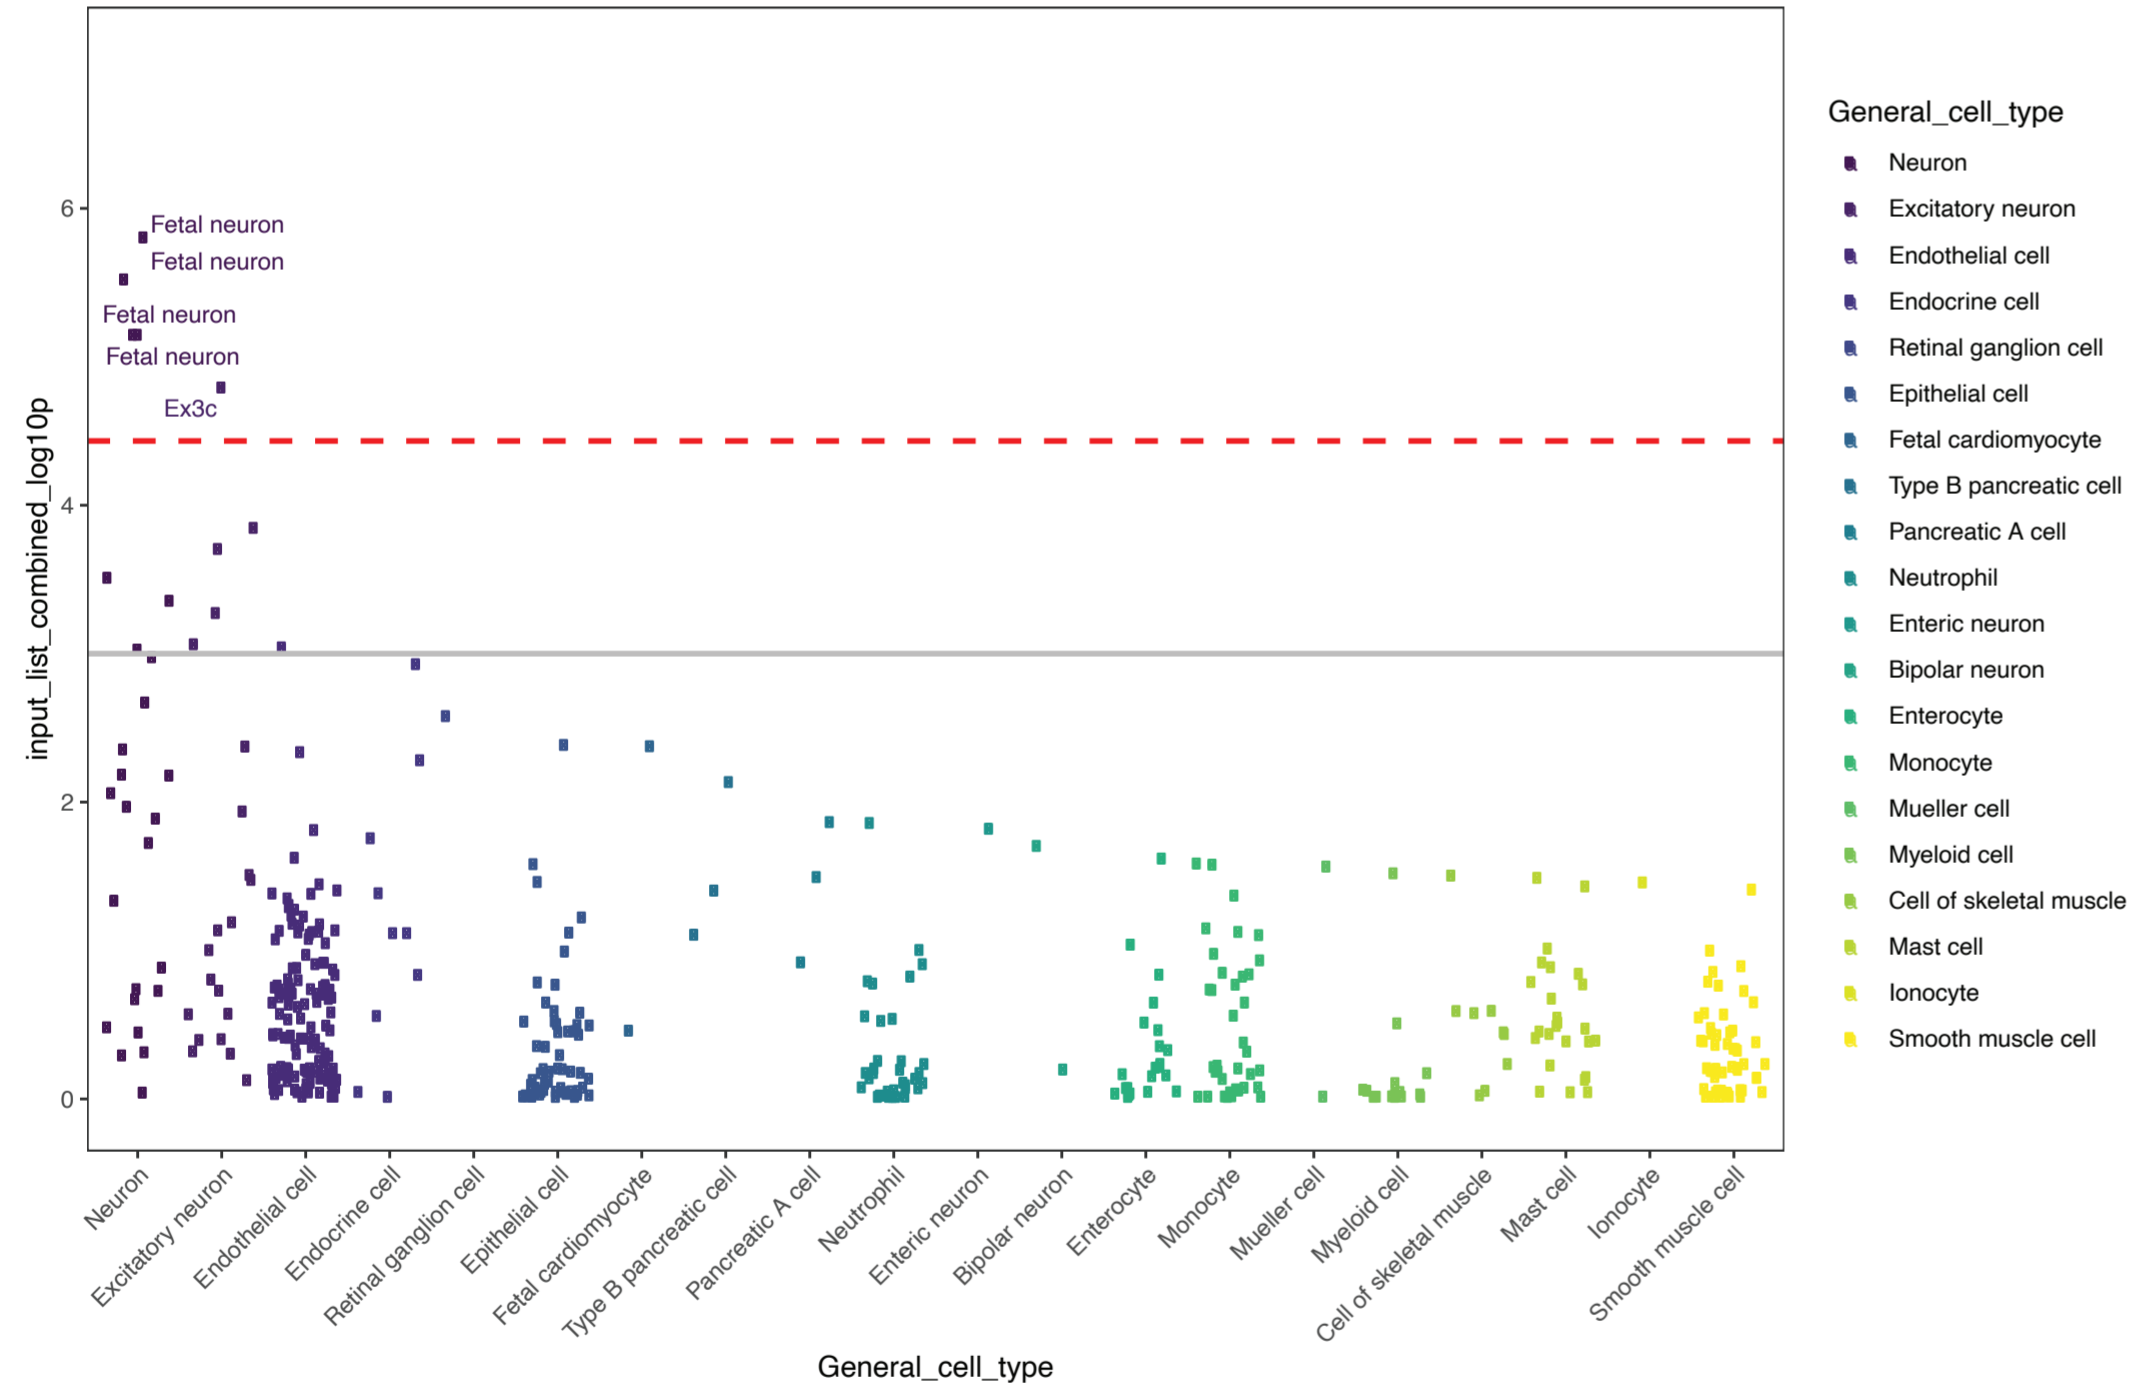

M18-steroid dehydrogenase activity Top20 general cell types

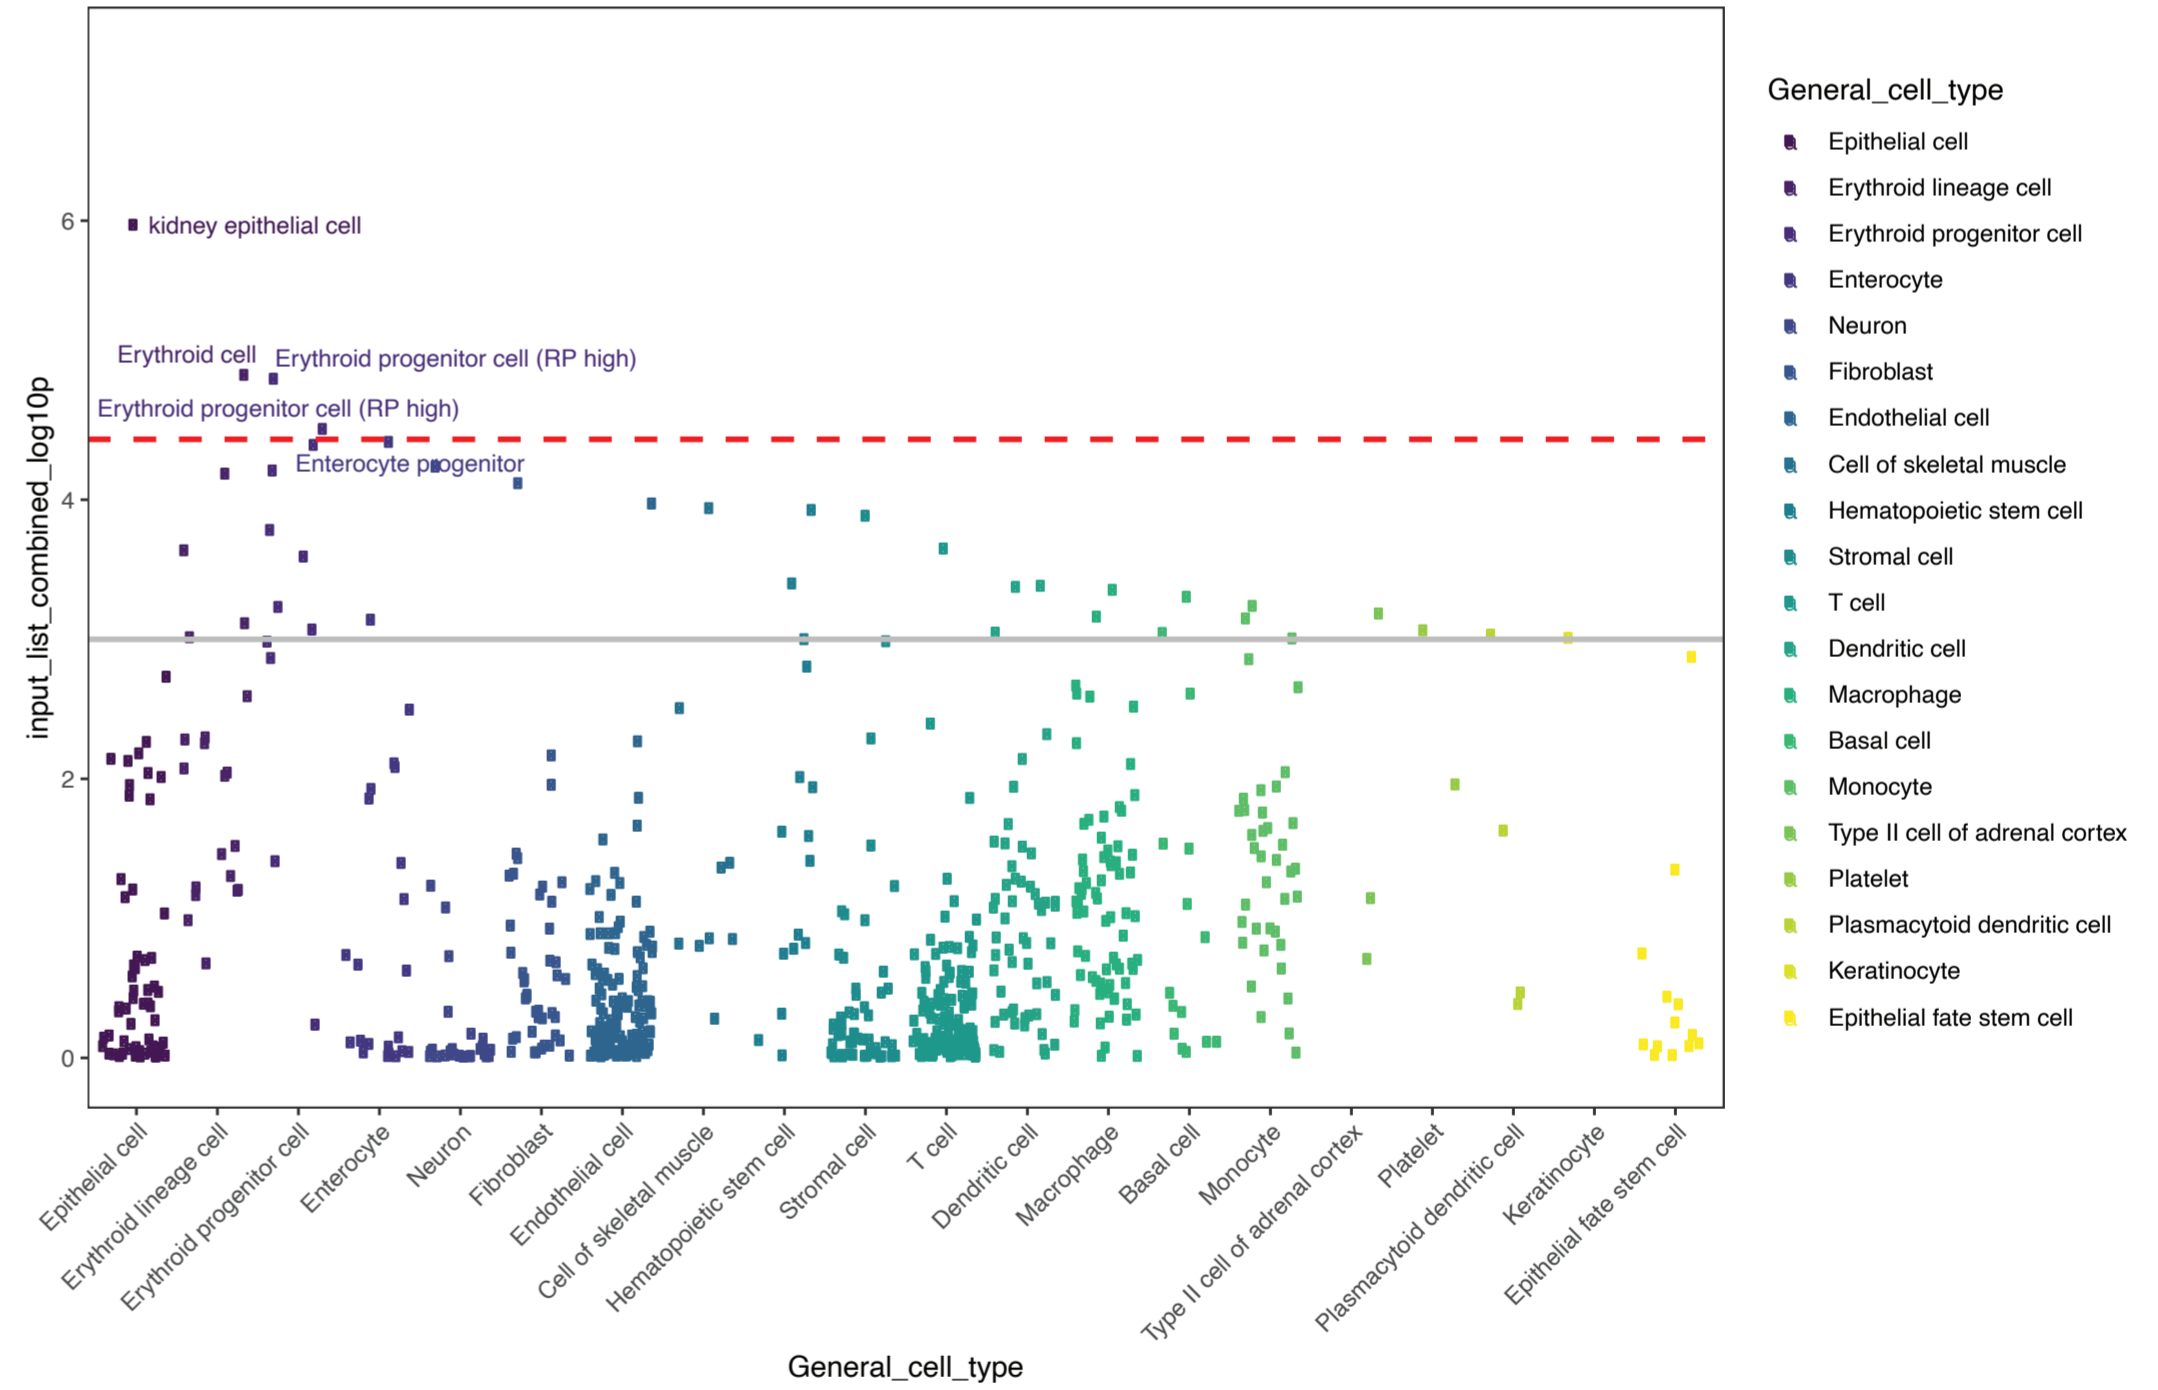

M7-ubiquitination Top20 general cell types

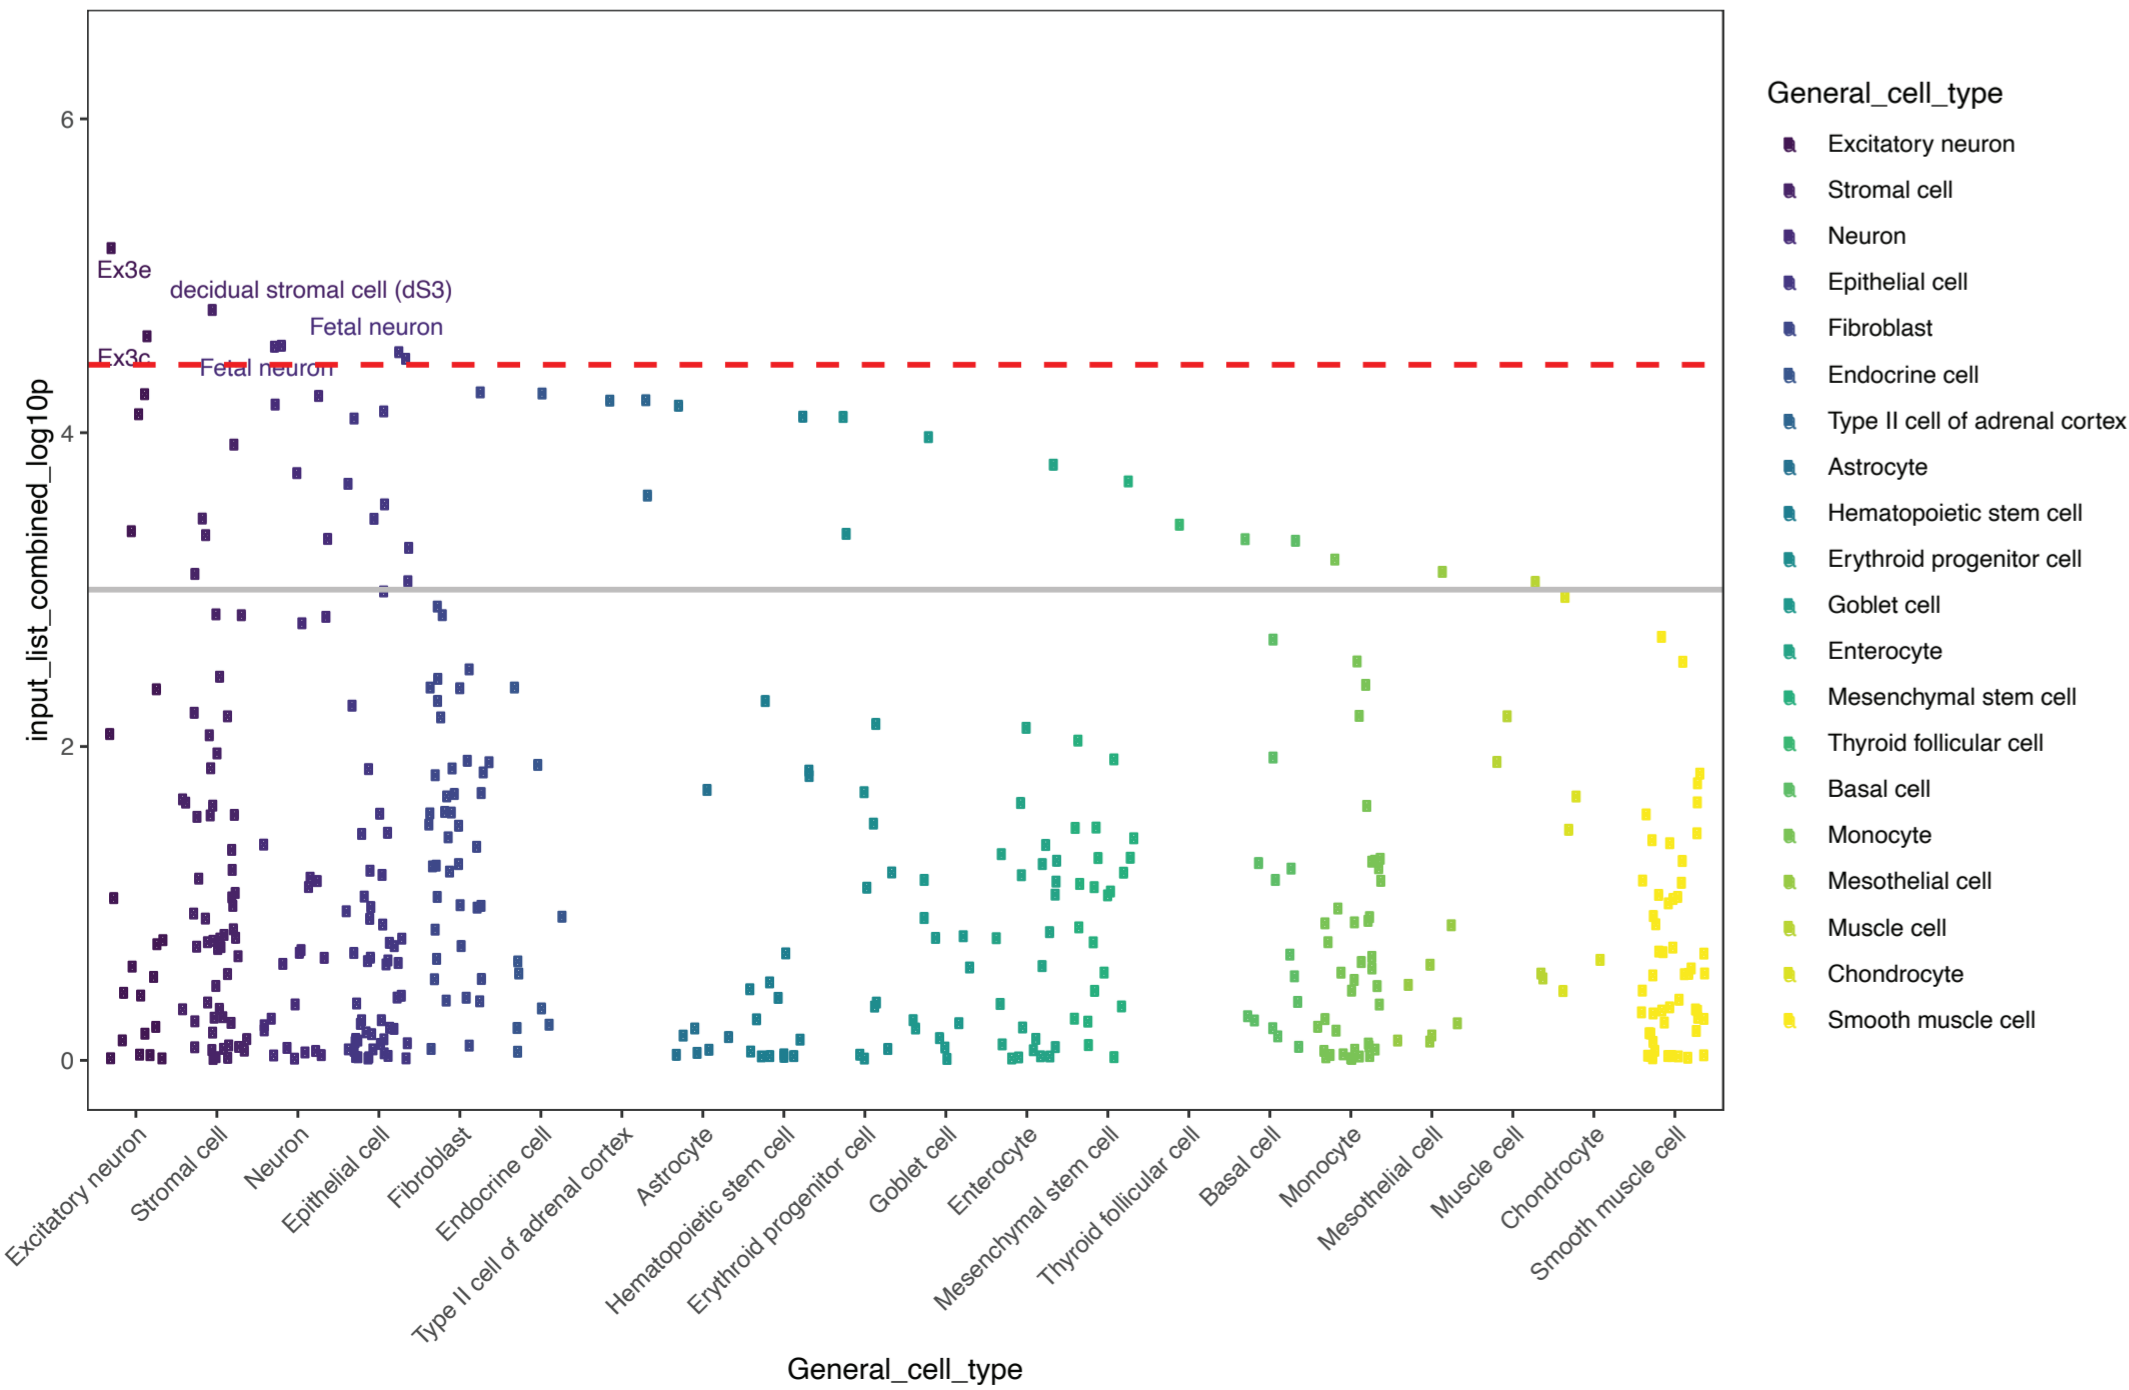

M25-axon guidance Top20 general cell types

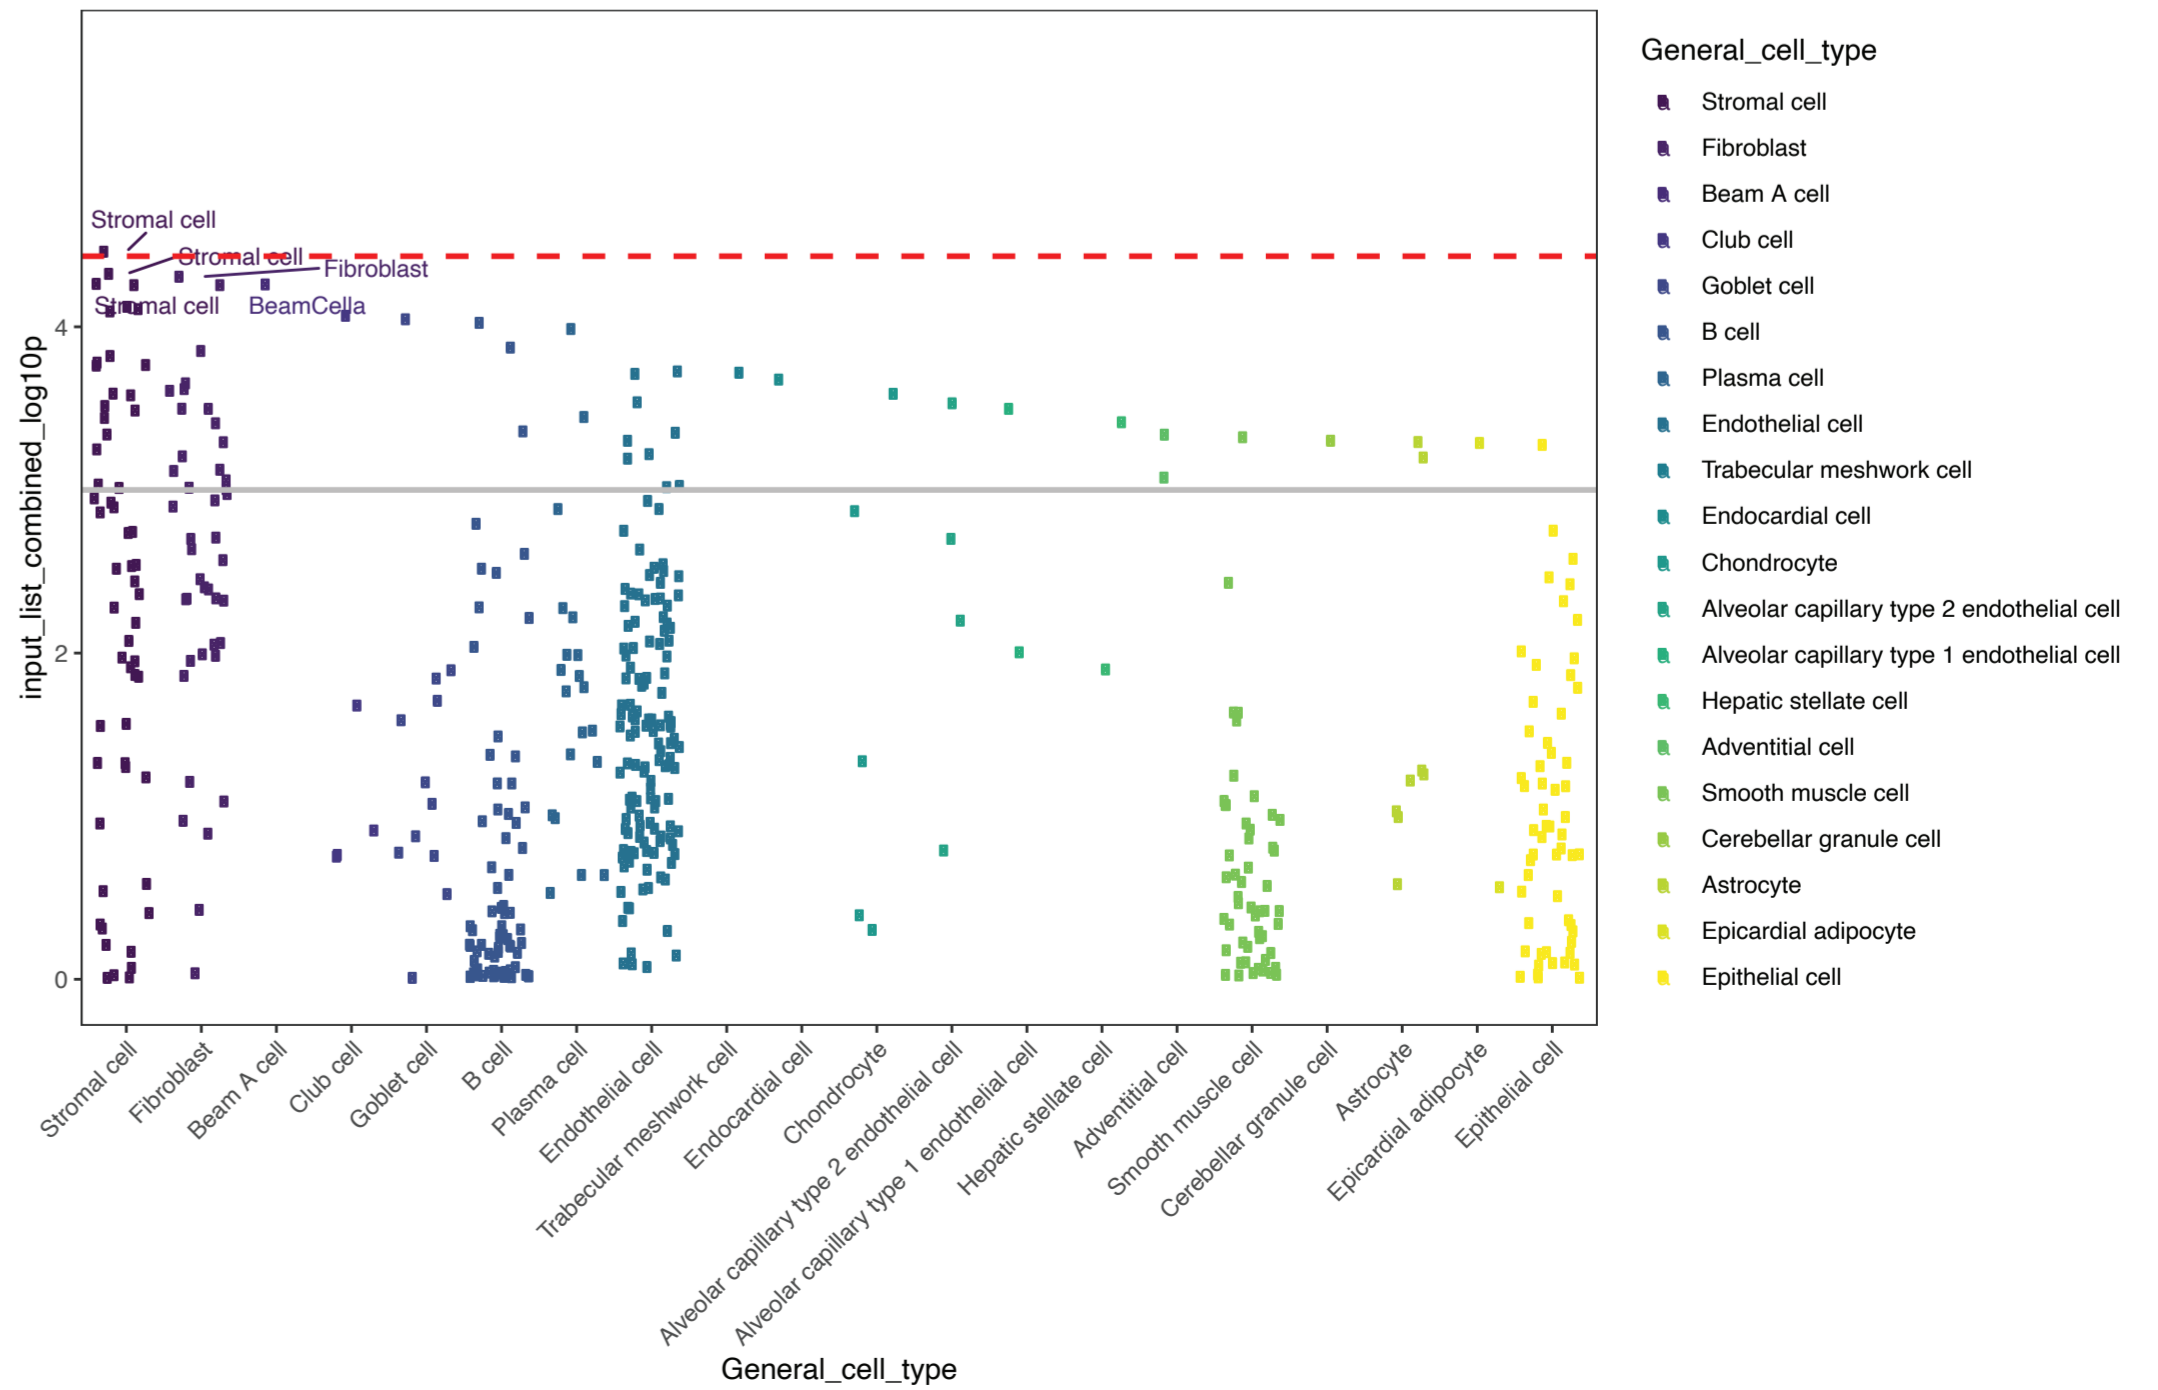

Supplement: ALZ-20-1851-s009.pdf [file ALZ-20-1851-s009.pdf]
